# Supplementary material for: Remodelling of Rea1 linker domain drives the removal of assembly factors from pre-ribosomal particles
Source: PubMed Central journal article supplement (PMC11603028; doi:10.1038/s41467-024-54698-w), 2024-11-27
Supplement: 41467_2024_54698_MOESM1_ESM.pdf [file 41467_2024_54698_MOESM1_ESM.pdf]

## **Supplementary Information**

**Remodelling of Rea1 linker domain drives the removal  
of assembly factors from pre-ribosomal particles**

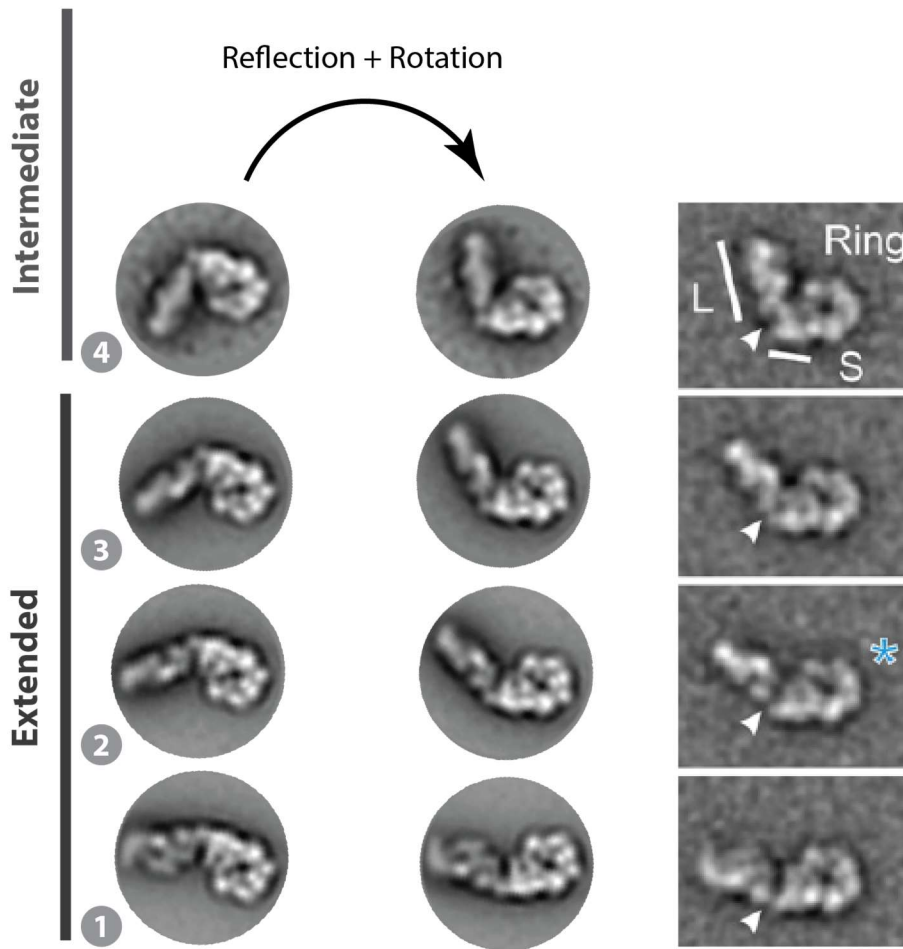

Ulbrich et al., Cell, 2009

**Supplementary Fig. 1: Comparison of Rea1<sub>wt</sub> negative stain EM 2D classes with published data.** States 1 -4 are similar to 2D classes published by Ulbrich et al.

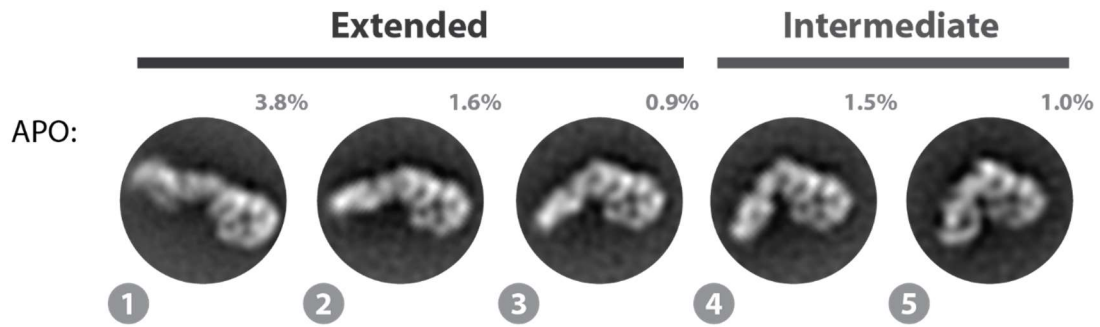

**Supplementary Fig. 2: Negative stain EM analysis under APO conditions of EDTA purified Rea1<sub>wt</sub>.** Rea1<sub>wt</sub> was purified in the presence of 5 mM EDTA and subsequently analysed by negative stain EM without adding nucleotide. Only the extended and intermediate linker conformations were detected. Percentage numbers indicate how many particles of the data set sorted into the displayed 2D class averages.

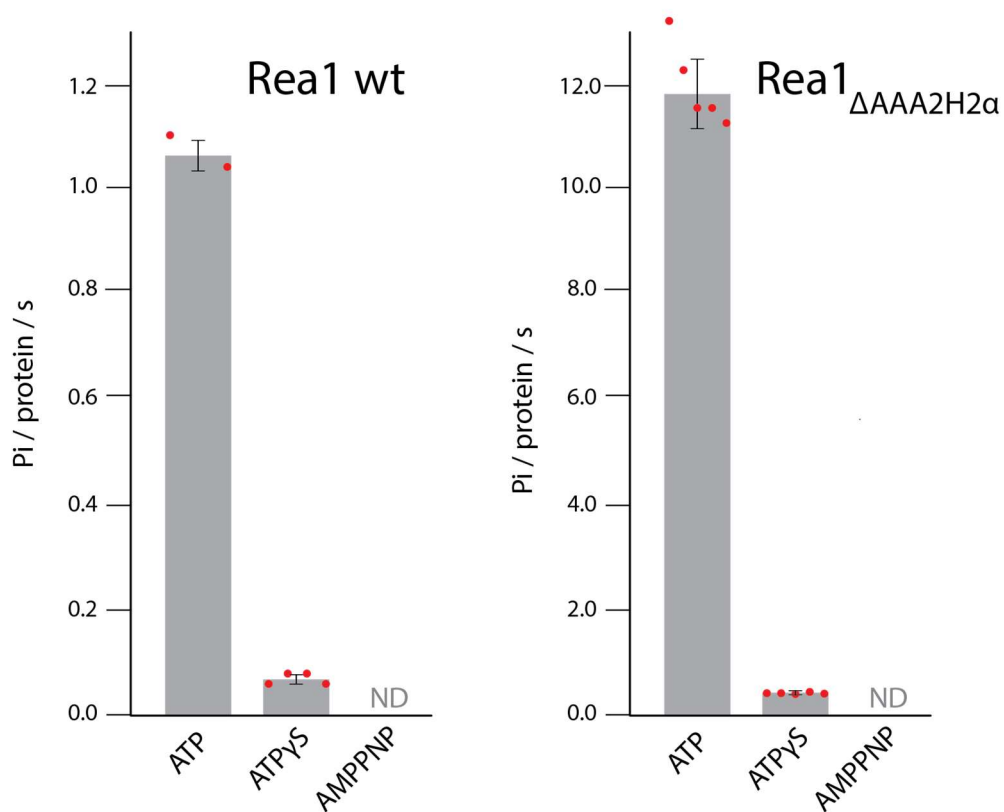

**Supplementary Fig. 3: ATPase activities of Rea1<sub>wt</sub> and Rea1 $\Delta$ AAA2H2 $\alpha$ .** Right panel: Rea1<sub>wt</sub> is able to hydrolyse ATP and, at a slower rate, also ATP $\gamma$ S. In the presence of AMPPNP, no Rea1<sub>wt</sub> hydrolysis activity is detected. Left panel: The Rea1 $\Delta$ AAA2H2 $\alpha$  mutant shows a  $\approx$ 10 fold higher ATP hydrolysis activity than Rea1<sub>wt</sub>. ATP $\gamma$ S can be hydrolysed at a slower rate. There is no detectable hydrolysis activity with AMPPNP as substrate. Rea1<sub>wt</sub> + ATP n=2, Rea1<sub>wt</sub> + ATP $\gamma$ S n=4, Rea1 $\Delta$ AAA2H2 $\alpha$  + ATP n=5, Rea1 $\Delta$ AAA2H2 $\alpha$  + ATP $\gamma$ S n=5. Error bars show the standard deviation.

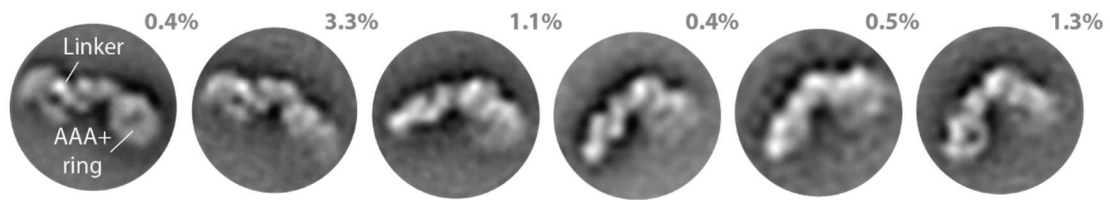

**Supplementary Fig. 4: Negative stain 2D class averages of Rea1 $\Delta$ AAA2H2 $\alpha$  in the absence of nucleotide.** Linker conformations consistent with states 1 – 5 of the extended and intermediate classes can be observed. Percentage numbers indicate how many particles of data set sorted into the displayed 2D class averages.

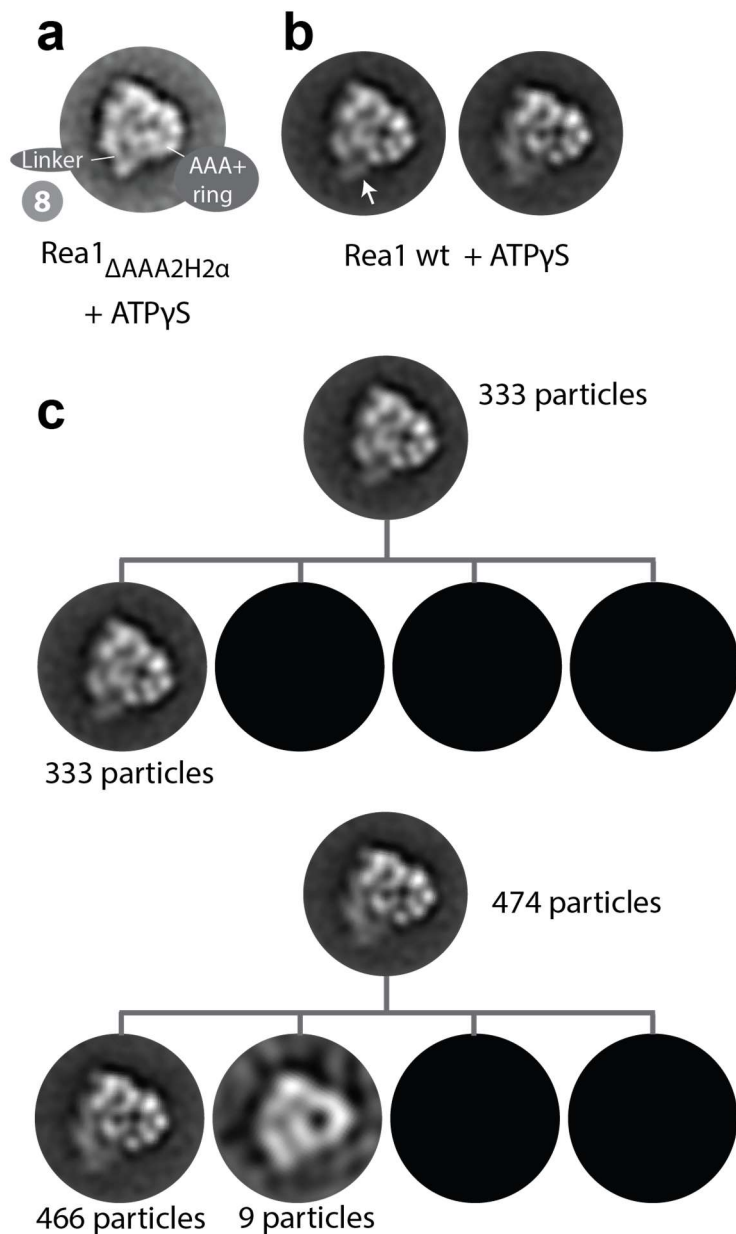

**Supplementary Fig. 5: Linker remodelling state 8 is not stable in *Rea1<sub>wt</sub>*.** **a** State 8 as observed in *Rea1<sub>ΔAAA2H2α</sub>* in the presence of ATPγS. **b** Two 2D class averages obtained from a *Rea1<sub>wt</sub>* ATPγS data set. The two 2D classes are similar to state 8 of *Rea1<sub>ΔAAA2H2α</sub>*, but thin stain for the linker tip (left, white arrow) or the complete linker (right) indicates increased structural flexibility. **c** The increased structural flexibility of the linker in **b** might be due to a mixture of well-folded state 8 particles and partially or completely unfolded particles. To rule out this possibility, we re-classified the particles in **b** into 4 sub-classes. The sub-classification brings back the original 2D classes confirming that the linker in these classes is too flexible to stably sample state 8.

**a**

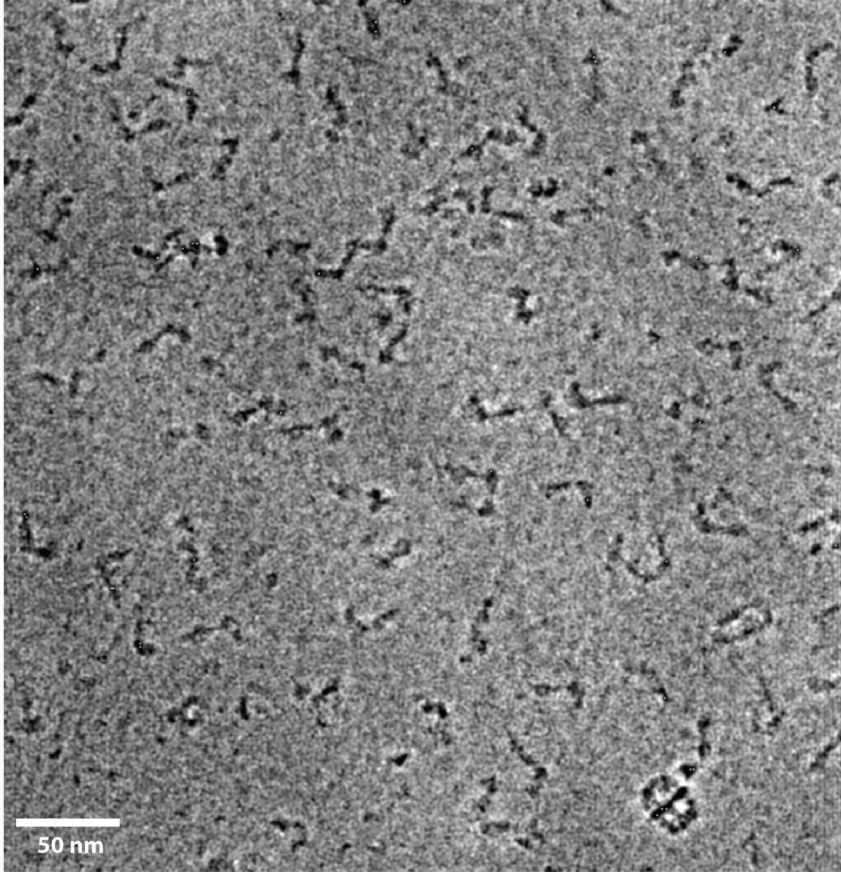

**b**

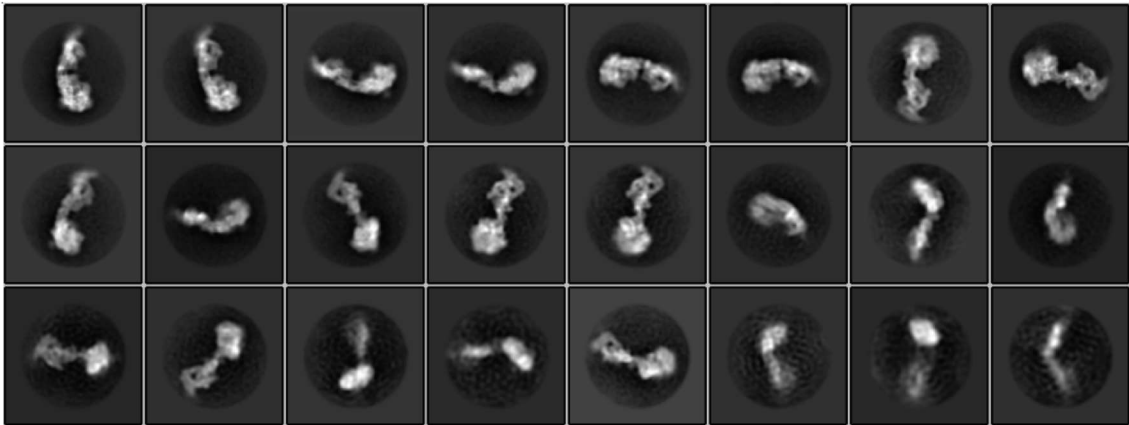

**Supplementary Fig. 6: Rea1 $\Delta$ AAA2H2 $\alpha$  ATP $\gamma$ S cryoEM data. a Micrographs, b Representative 2D classes.**

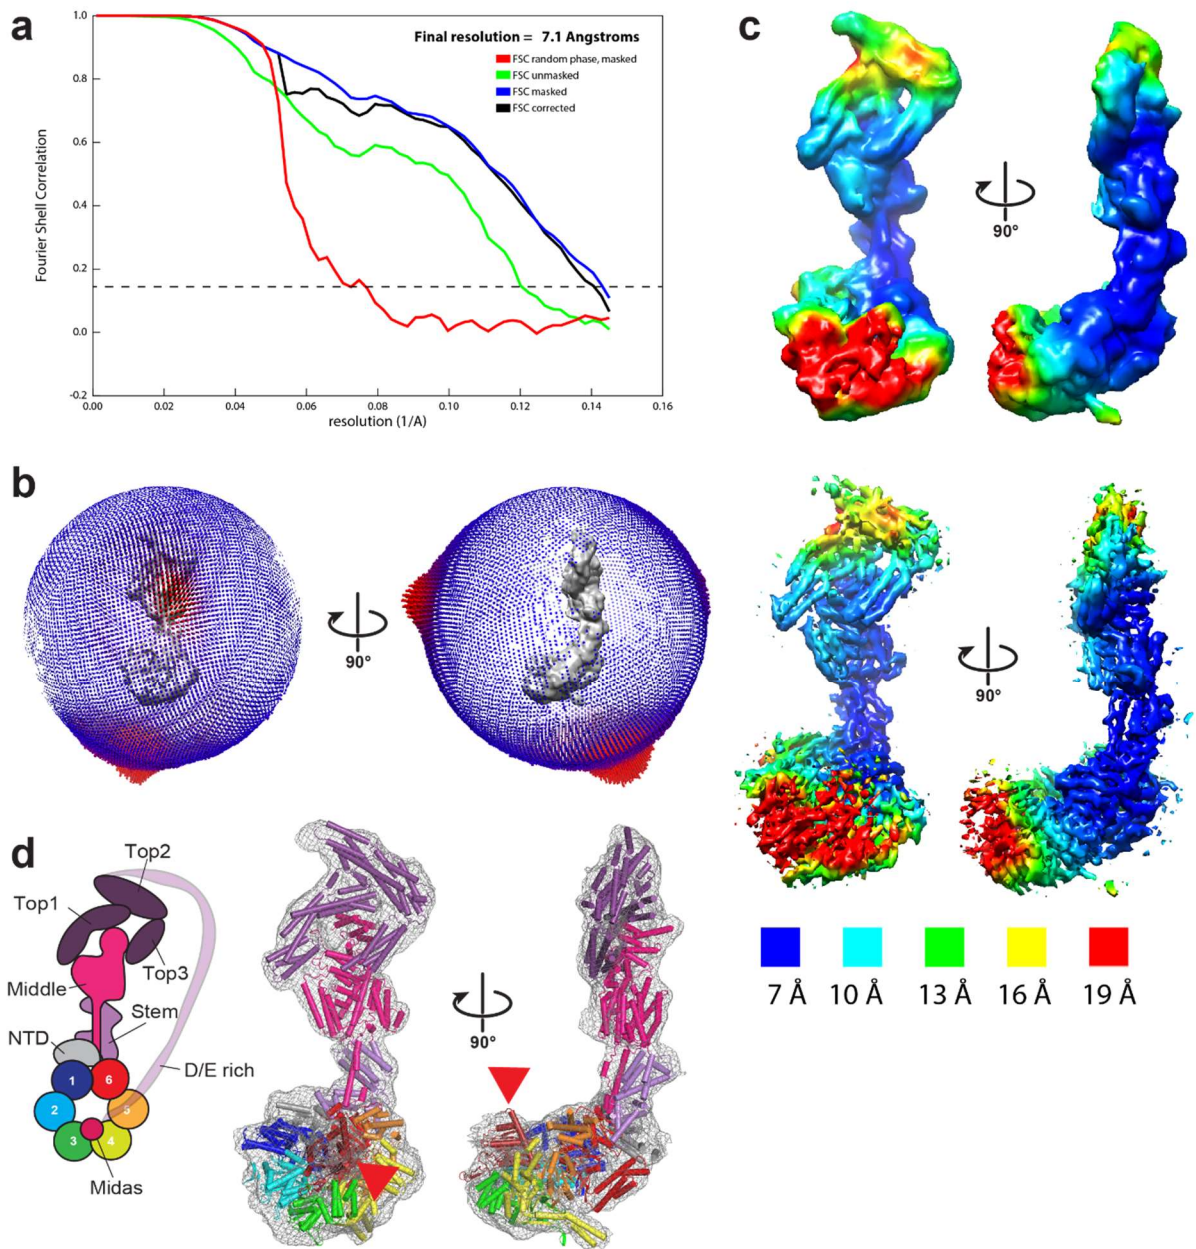

**Supplementary Fig. 7: Overall quality of the *Rea1* $_{\Delta\text{AAA}2\text{H}2\alpha}$  ATP $\gamma$ S cryoEM map.** **a** Fourier shell correlation (FSC) plot for half-maps of the 3D reconstruction. The 0.143 FSC criteria is indicated as horizontal dashed line. The final overall resolution is 7.1 Å. **b** Angular distribution of particles used in final reconstruction. **c** Local resolution map, upper panels: unsharpened map, lower panels: B-factor sharpened map. Secondary structure elements can be identified. **d** Schematic cartoon representation of structure (left) and match of structure in map (right). Red arrow heads highlight the AAA+ ring docked MIDAS domain. Cartoon adapted from Sosnowski et al. 2018<sup>17</sup>.



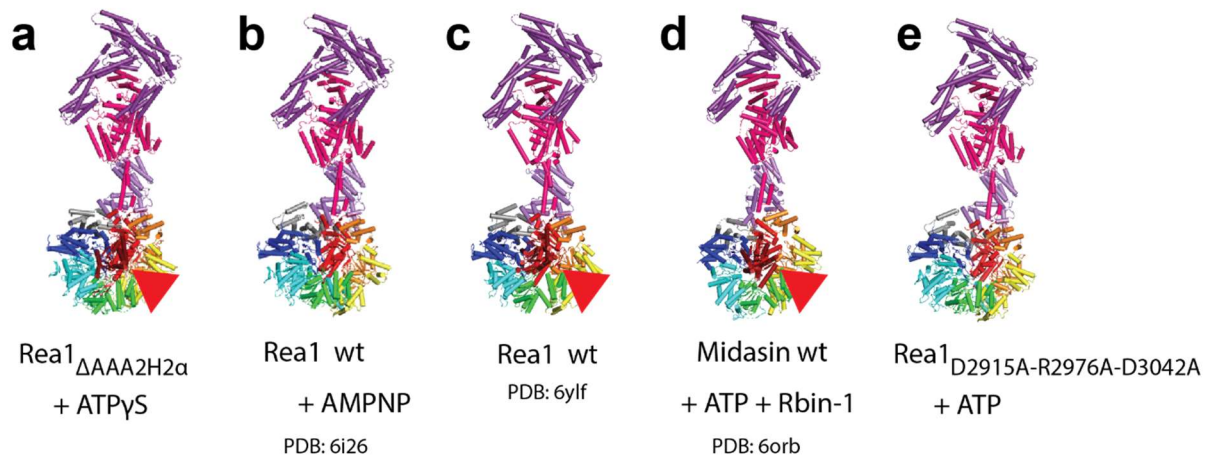

**Supplementary Fig. 8: Comparison of the straight linker in the Rea1<sub>ΔAAA2H2α</sub> ATPγS cryoEM structure with other Rea1/Midasin cryoEM structures.** **a** Straight linker in Rea1<sub>ΔAAA2H2α</sub> ATPγS structure (this study). **b** Rea1<sub>wt</sub> in the presence of AMPPNP (Sosnowski et al., 2018). **c** Rea1<sub>wt</sub> bound to a pre60S particle (Kater et al., 2020). **d** Midasin<sub>wt</sub> in the presence of ATP and the Rea1/Midasin inhibitor Rbin-1 (Chen et al., 2018). **e** Straight linker in Rea1<sub>D2915A-R2976A-D3042A</sub> (Conformation I) in the presence of ATP (this study). In all structures the linker adopts a similar straight conformation with respect to the AAA+ ring. Red arrow heads highlight the AAA+ docked MIDAS domain.

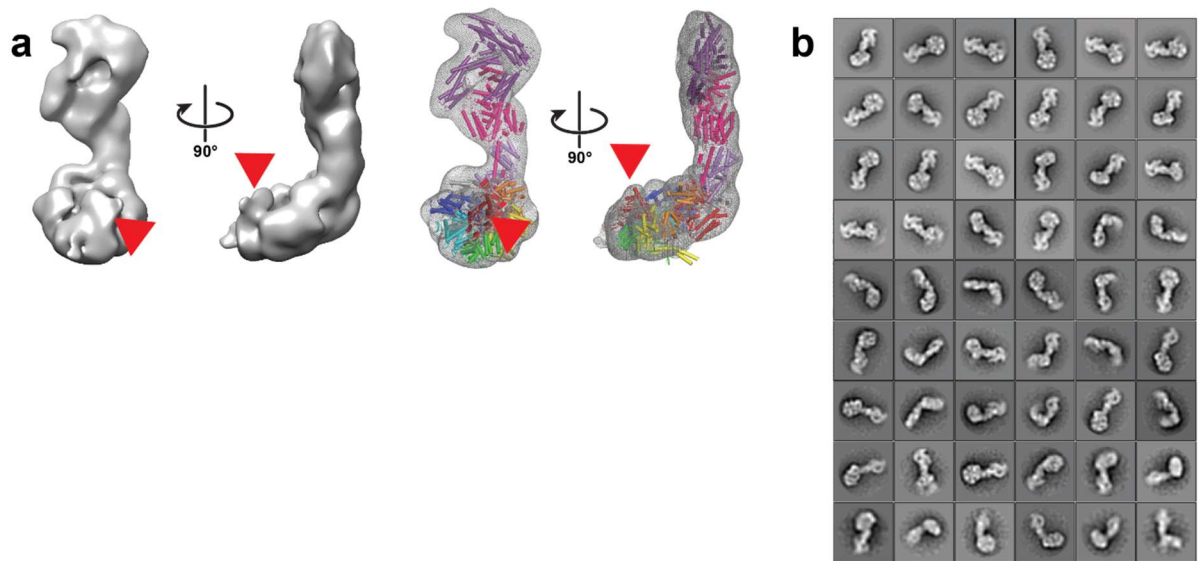

**Supplementary Fig. 9: 3D reconstruction of the Rea1 $\Delta$ AAA2H2 $\alpha$  ATP $\gamma$ S negative stain EM data set.** **a** Right panel: Final 3D reconstruction of the Rea1 $\Delta$ AAA2H2 $\alpha$  ATP $\gamma$ S negative stain EM data set. Left panel: Docking of the Rea1 $\Delta$ AAA2H2 $\alpha$  ATP $\gamma$ S cryoEM structure (Fig. 3a + Supplementary Fig. 7) into the negative stain EM map. The cryoEM structure, which represents the straight linker conformation, fits well into the negative stain EM map indicating that the negative stain data is not affected by staining artefacts. **b** 2D classification of the particles used in the final 3D reconstruction. The particles account for  $\approx$ 45% of the total particles in the data set, which suggests that the straight linker conformation shown in a is the dominant structural state. AAA+ ring top views like in Figure 2 are absent indicating that they do not represent the straight linker conformation.

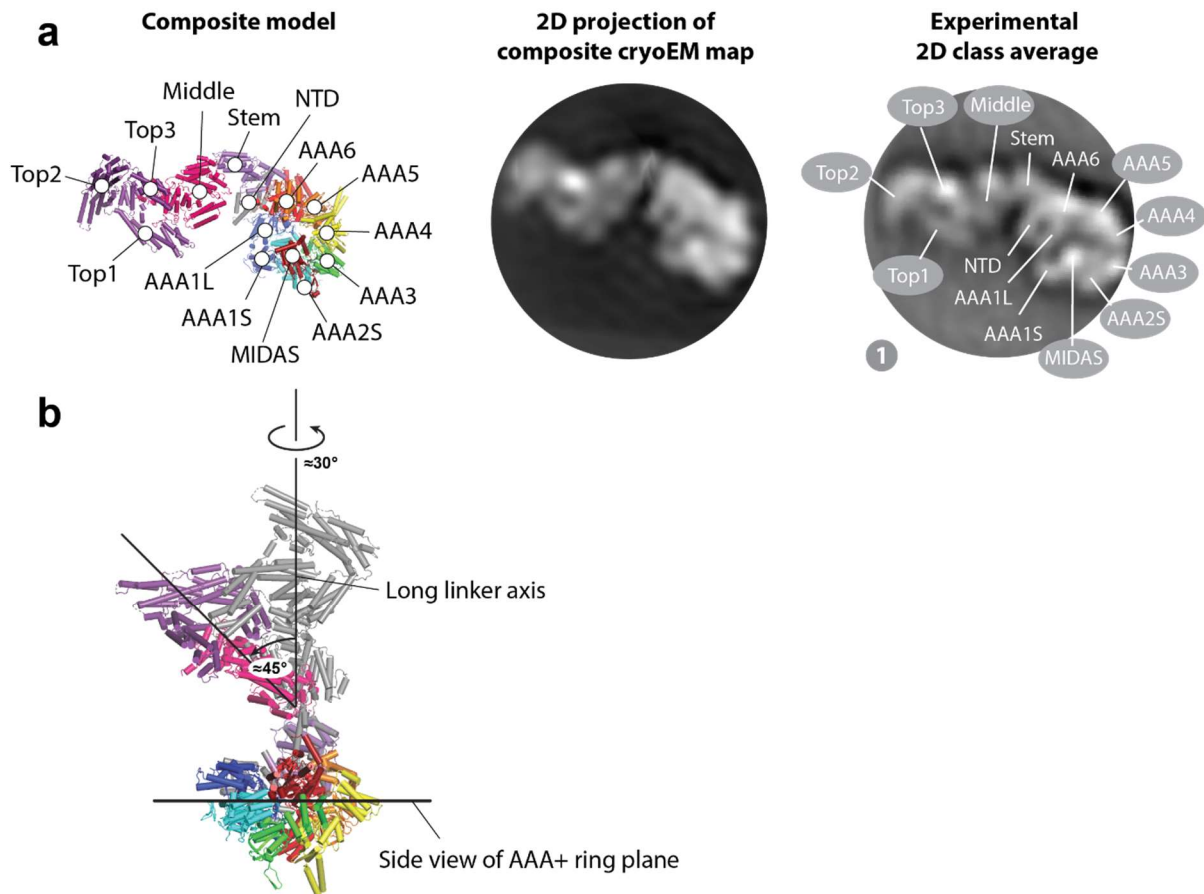

**Supplementary Fig. 10: The linker in state 1 has moved with respect to the AAA+ ring compared to the straight linker conformation in the *Rea1 $\Delta$ AAA2H2 $\alpha$*  ATP $\gamma$ S cryoEM structure. **a** Combining the AAA+ ring map in the orientation used to assign the AAA+ sub-domains in state 1 with the linker map in the orientation used to assign linker sub-domains in state 1 by overlapping the linker stem area allowed us to create a structural composite model for state 1. **b** Aligning the AAA+ ring of this composite model with the AAA+ ring in the *Rea1 $\Delta$ AAA2H2 $\alpha$*  ATP $\gamma$ S cryoEM structure reveals that the linker top and middle domains have rotated by  $\approx 30^\circ$  and swung by  $\approx 45^\circ$  towards the AAA+ ring plane. Straight linker of the *Rea1 $\Delta$ AAA2H2 $\alpha$*  ATP $\gamma$ S cryoEM structure is shown in grey.**

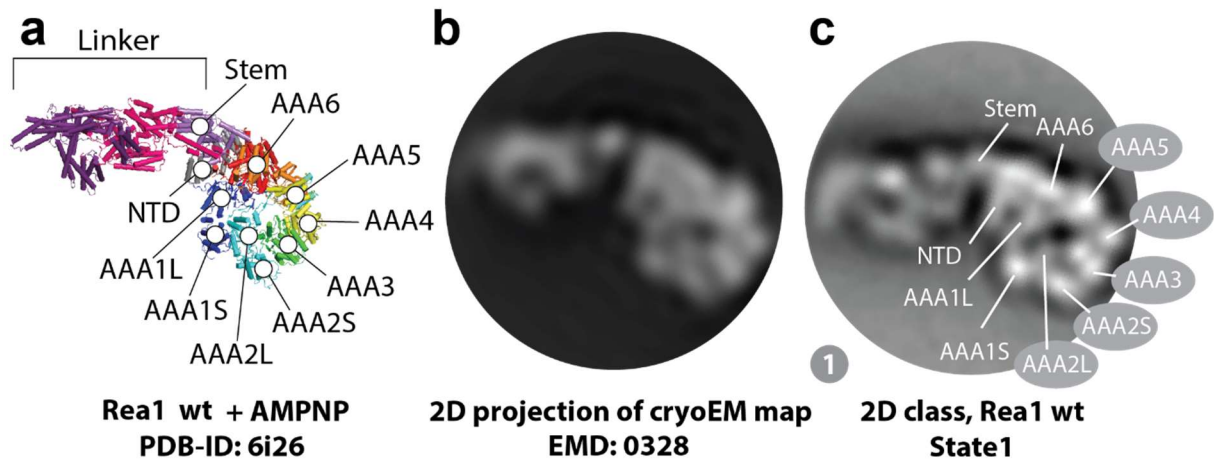

**Supplementary Fig. 11: The AAA+ ring in the 2D class averages of Rea1<sub>wt</sub> does not harbour a docked MIDAS domain.** **a** Structure of Rea1<sub>wt</sub> in the presence of AMPNP (Sosnowski et al., 2018<sup>17</sup>). The AAA+ ring does not feature a docked MIDAS domain **b** 2D projection of the corresponding cryoEM map of a low pass filtered to 25 Å. **c** The AAA+ ring in the 2D class averages of Rea1<sub>wt</sub> (here state 1 as example) matches well with the projection in **b** suggesting the MIDAS domain is not docked onto the AAA+ ring.

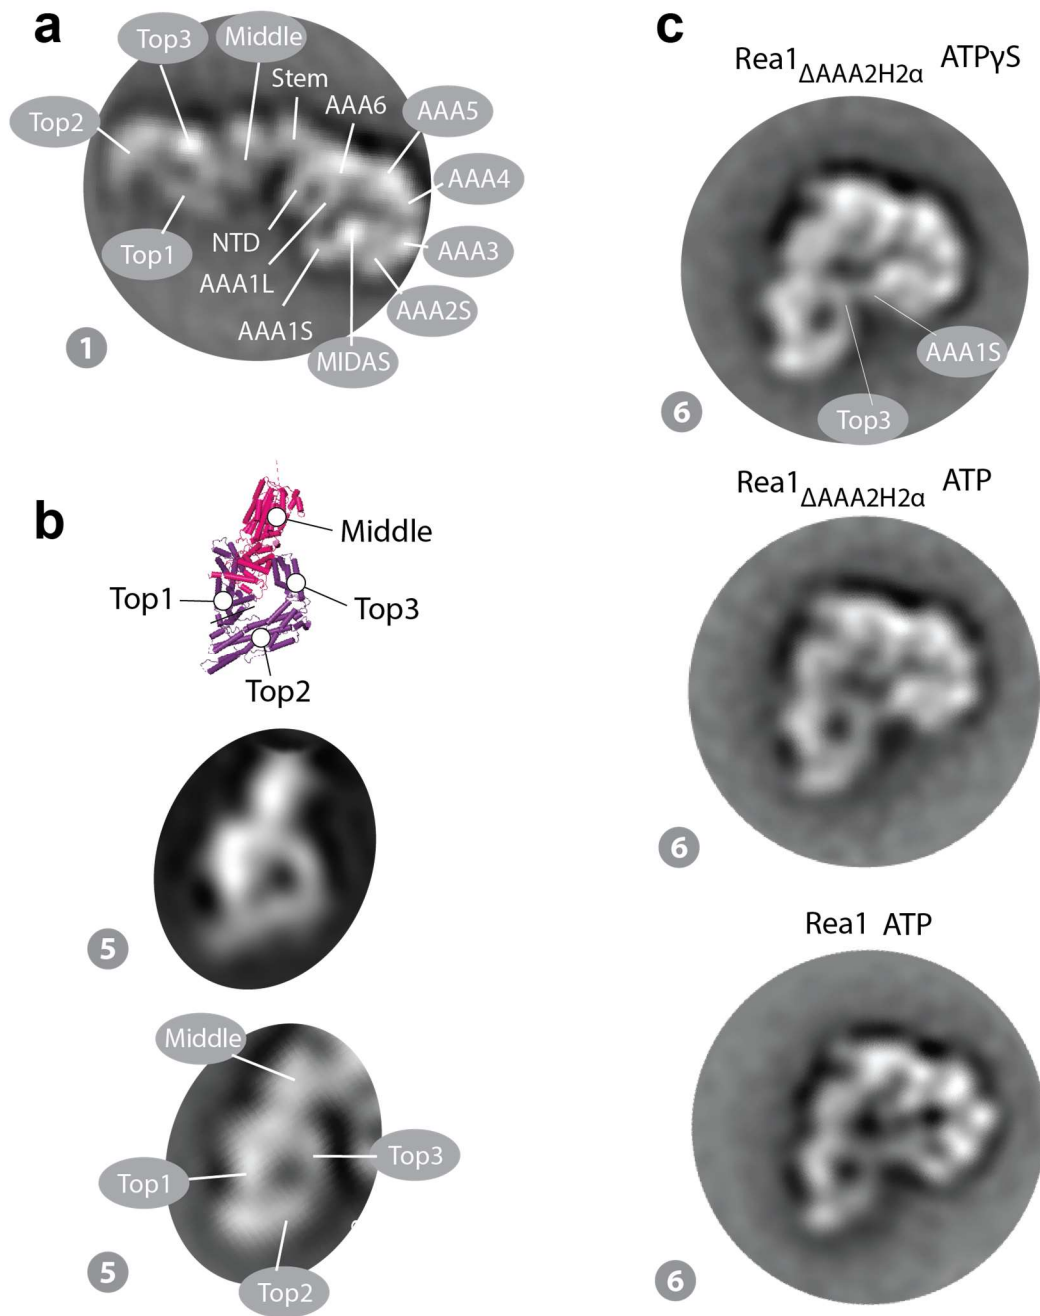

**Supplementary Fig. 12: State 6 of the AAA+ ring engaged linker conformations features a connection between AAA1S and the linker top3 domain.** **a** Domain assignments in the AAA+ ring and linker. **b** Two upper panels: Linker middle and top domains rotated into state 5 and corresponding cryoEM map projection (compare also Fig. 4c and d). Lower panel: Assignment of linker domains in state 5 based on the two upper panels. **c** The domain assignments in a and b suggest a connection between AAA1S and the linker top3 domain in state 6. The connection is visible in three independently collected data sets.

**a**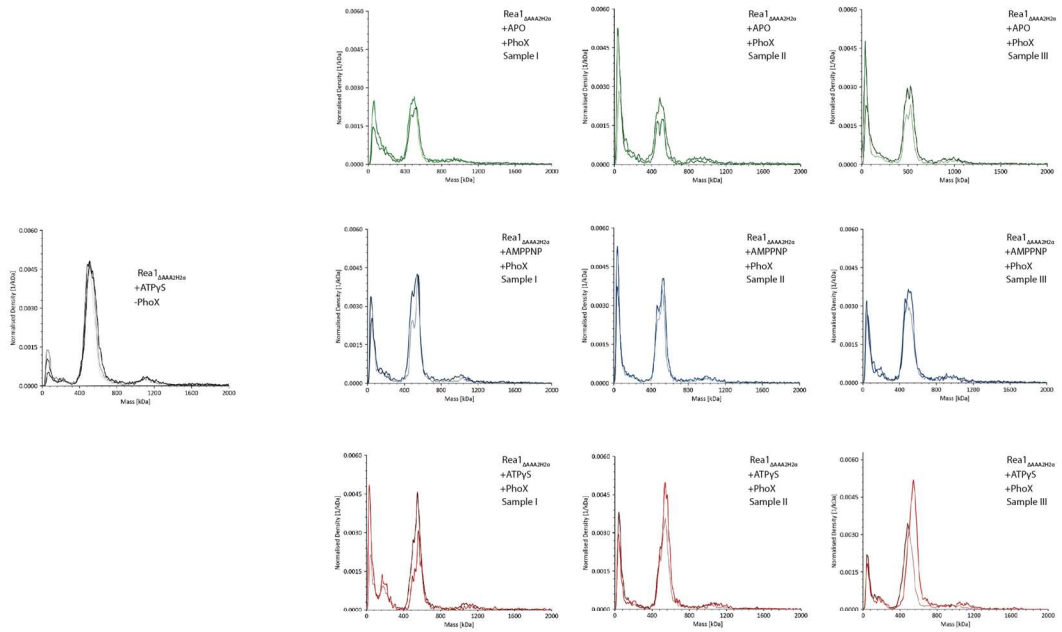**b**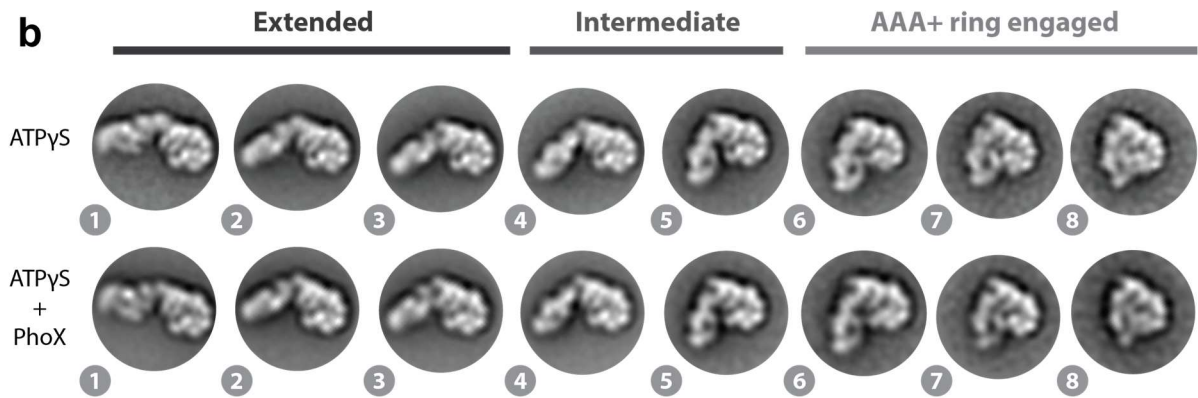**c**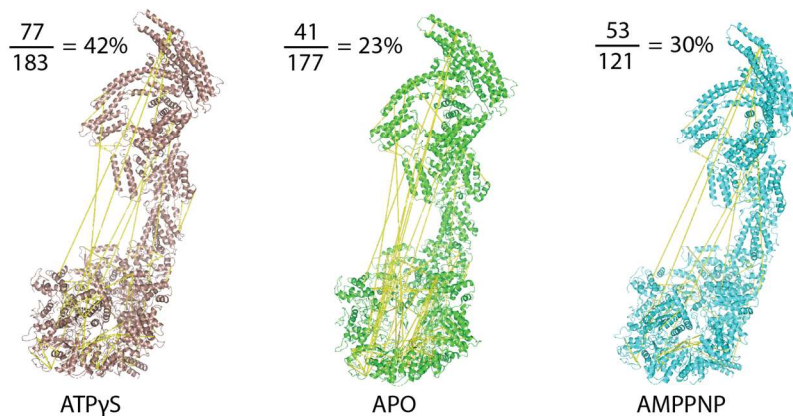

**Supplementary Fig. 13: Validation of Rea1<sub>ΔAAA2H2α</sub> Phox crosslinking.** **a** Mass Photometry was used to analyse the amount of unspecifically crosslinked dimers. The theoretical mass for a Rea1<sub>ΔAAA2H2α</sub> monomer is 580 kDa. Solid lines represent the Gaussian-fits of major species. Compared to the non-crosslinked control (-Phox) no significant stabilization or enrichment of Rea1<sub>ΔAAA2H2α</sub> dimers is observed in the three analysed Phox crosslinked APO, AMPPNP and ATPγS replicates. This indicates that the detected crosslinks predominantly originate from intra-molecular interactions **b** A negative stain EM analysis demonstrates that presence of the Phox crosslinker does not alter ATPγS induced linker

remodelling in Rea1 $\Delta$ AAA2H2 $\alpha$ . **c** 182, 177 and 121 K-K unique crosslinks were detected in the PhoX crosslinked Rea1 $\Delta$ AAA2H2 $\alpha$  ATP $\gamma$ S, APO and AMPPNP samples. Out of these 77 (42%) (ATP $\gamma$ S), 41 (23%) (APO) and 53 (44%) (AMPPNP) can be assigned and distance-validated on the straight linker conformation as represented by the Rea1 $\Delta$ AAA2H2 $\alpha$  ATP $\gamma$ S cryoEM structure (compare Fig. 3a), which is expected to be the dominant structural state in all samples. A maximal C $\alpha$ -C $\alpha$  distance cut off of 25 Å was used to validate the crosslinks on the structure. The remaining crosslinks could be attributed to alternative Rea1 conformations, for which there is currently no 3D structural information available. The fact, that significant portions of the detected crosslinks can be assigned to a known structural state indicates a high quality of the crosslinking data.

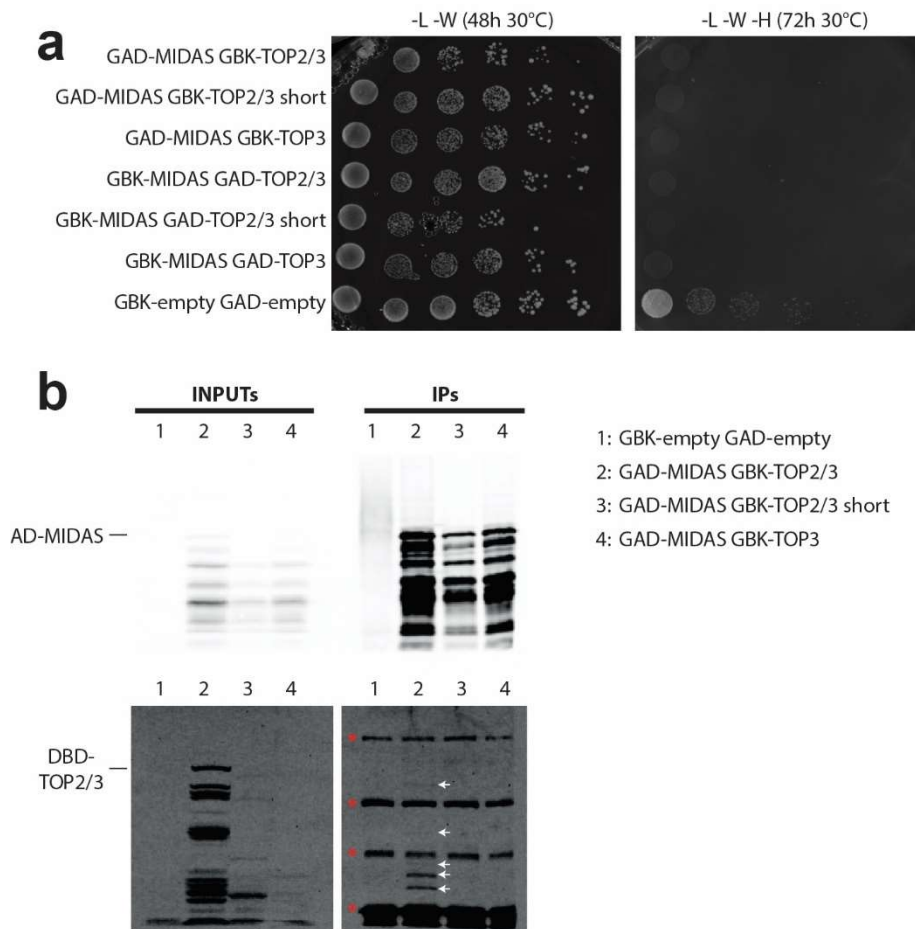

**Supplementary Fig. 14: The MIDAS domain interacts with the linker top2/top3 region.** **a** The MIDAS domain (E4623-S4910) was fused to 3xHA-GAL4AD (GAD, GAL4 activator domain) and the linker top2/top3 region (Y3557-N4041, short: I3601-N4041) or just the top3 region (D3786-E3905) to 3xMyc-GAL4BD (GBK, GAL4 DNA binding domain). Another set of plasmids reversed the GAD/GBK fusion constructs as indicated. The cells grew well on plates selecting the markers of the GAD/GBK plasmids (right panel, plates lacking leucine (L) and tryptophan (W)). Plating the cells on selective medium further lacking histidine (H) to check if the reporter *his3* expression has been induced, revealed that cells expressing the MIDAS/linker top2/top3 constructs grew slower than the empty vector control indicating toxicity to the cells. **b** In an alternative approach to probe for MIDAS-Linker top2/top3 interactions we carried out GAD-MIDAS immunoprecipitation experiments using anti-HA agarose beads. We checked for expression of the GAD-MIDAS and GBK-Linker top2/top3 constructs in the input lysates by anti-HA and anti-Myc western blot (left upper and left lower panel). The MIDAS and Linker top2/top3 constructs are prone to degradation. The degradation is especially pronounced in the case of the short linker top2/top3 as well as the linker top3 GBK constructs (lanes 3 and 4, left lower panel). Upper right panel: The GAD-MIDAS construct was pulled out from the input lysates via anti-HA agarose beads. The elution was subsequently analysed by anti-HA western blot. GAD-MIDAS can be detected in all elutions (lanes 2 – 4). Lower right panel: The eluates were also analysed by anti-myc western blot to probe for the presence of GBK-Linker top2/top3 constructs. In the case of the GBK-Linker top2/top3 constructs (lane 2), several degradation fragments can be detected (white arrows) indicating that parts of the Linker top2/top3 region are able to interact with the MIDAS domain. Signals marked with red asterisks likely result from detection of anti-HA antibody fragments present in the anti-HA agarose bead elutions by the secondary antibody.



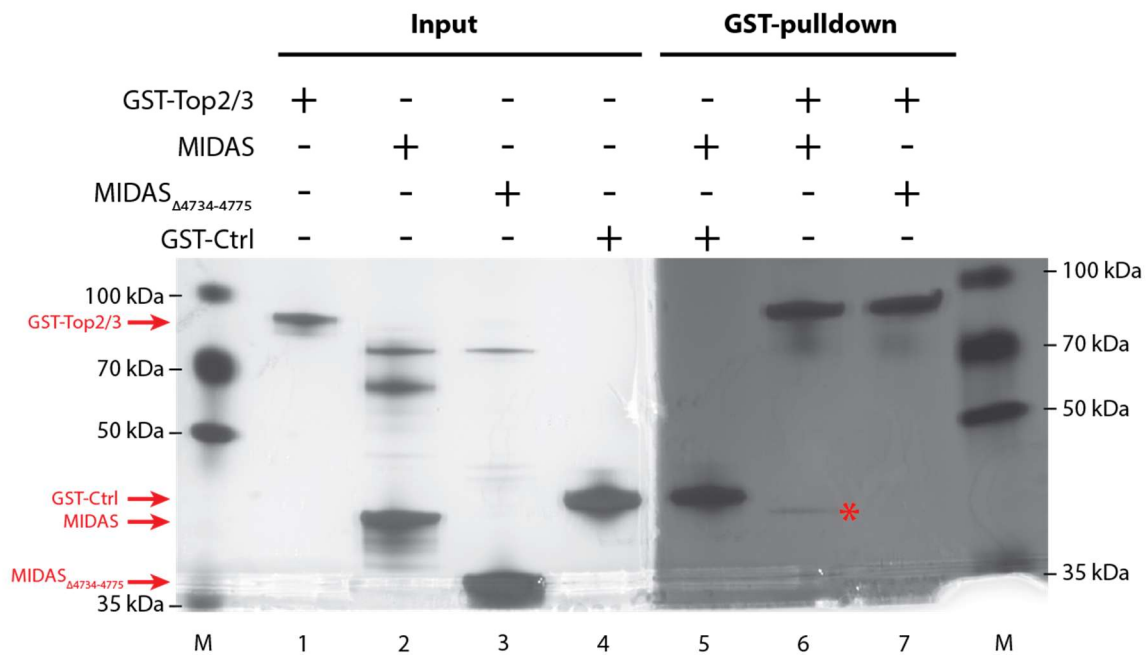

**Supplementary Fig. 15: GST-linker top2/3 pulldown experiments with full length MIDAS and the MIDAS<sub>Δ4734-4775</sub> construct.** The samples were run on a SDS gel and silver stained. *C. thermophilum* GST-linker top2/3 pulls down the full length *C. thermophilum* MIDAS domain (lane 6, red asterisk), but not the MIDAS<sub>Δ4734-4775</sub> construct (lane 7), which lacks the conserved T4733-K4778 loop (equivalent to the conserved *S. cerevisiae* MIDAS E4656-K4700 loop). The results suggest that the conserved loop region is involved in the linker top2/top3 – MIDAS interaction. M: marker, lanes 1, 2, 3 and 4: purified GST-linker top2/3 construct, MIDAS domain, MIDAS<sub>Δ4734-4775</sub> and GST control. Lanes 5, 6 and 7: GST-control + MIDAS domain pulldown, GST-linker top2/3 + MIDAS domain pulldown and GST-linker top2/3 + MIDAS<sub>Δ4734-4775</sub> pulldown. Samples were run together on the same SDS gel. Input and GST-pulldown lanes were separated and treated independently to avoid overdevelopment of the input lanes. The pulldown experiment was carried out once.

**a**

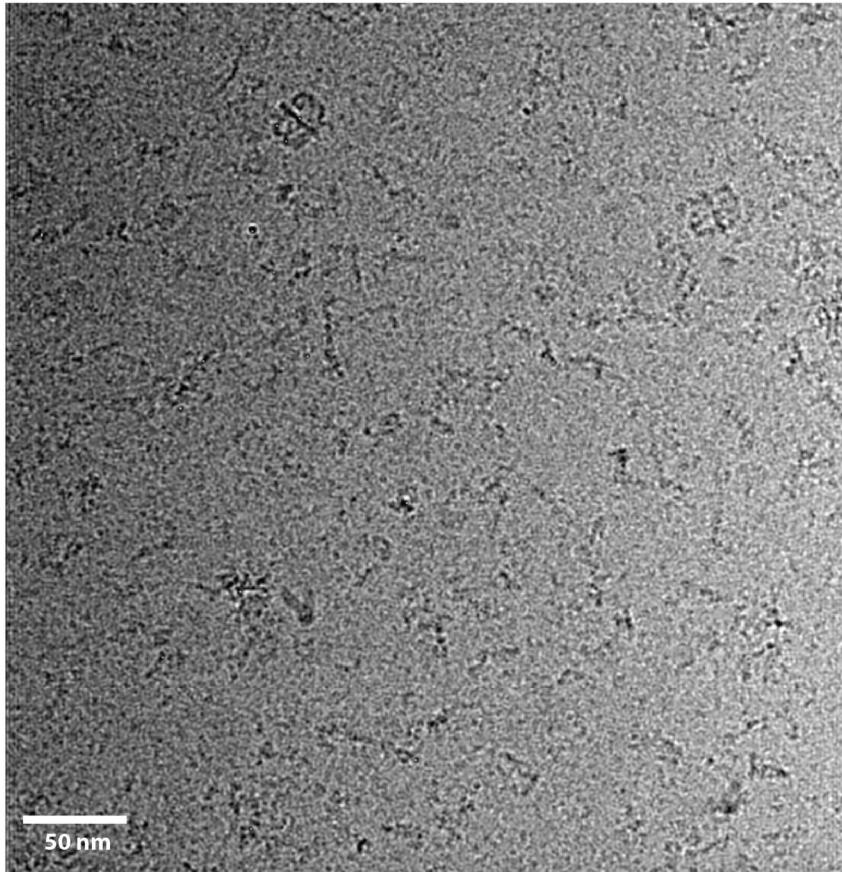

**b**

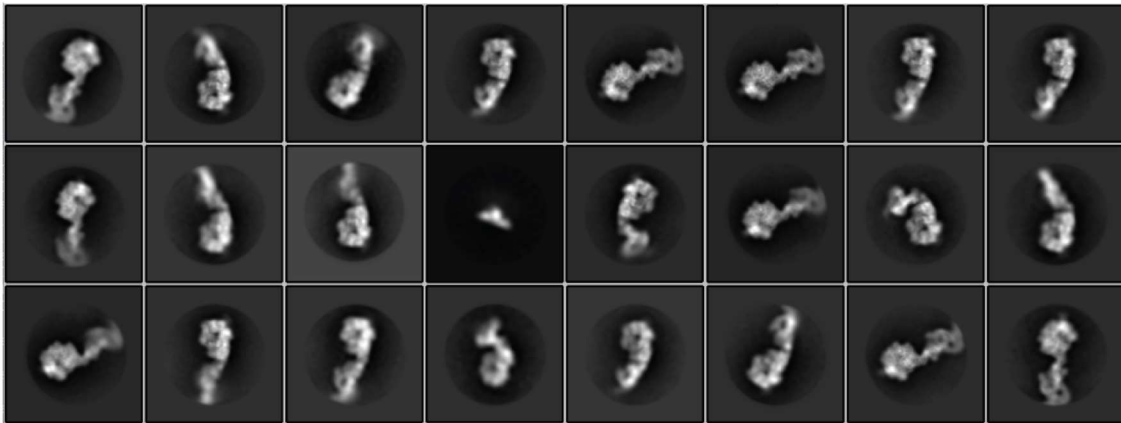

**Supplementary Fig. 16: Rea1<sub>D2915A-R2976A-D3042A</sub> ATP cryoEM data. a** Micrograph, **b** Representative 2D classes.

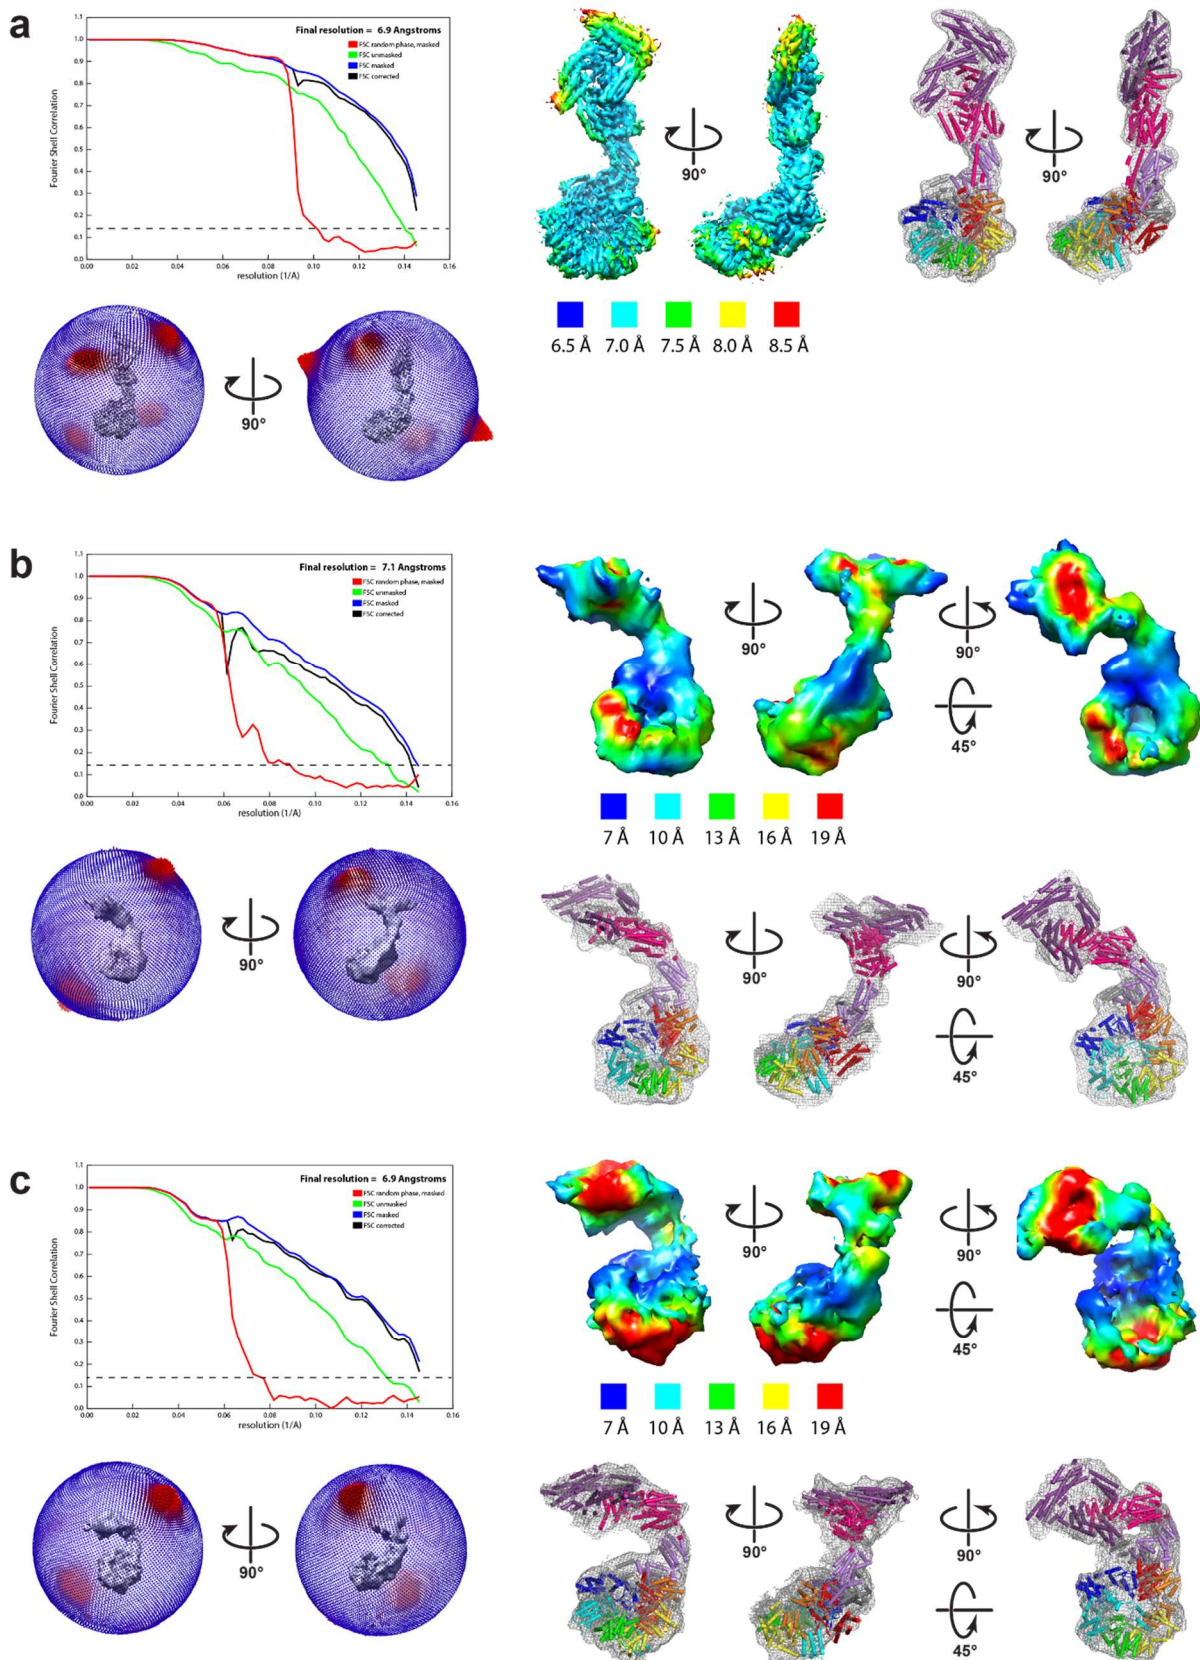

**Supplementary Fig. 17: Overall quality of the Rea1<sub>D2915A-R2976A-D3042A</sub> ATP cryoEM maps.** Fourier shell correlation (FSC) plot for half-maps of the 3D reconstructions (upper left panels, 0.143 FSC criteria is indicated as horizontal dashed line), angular distribution of particles used in final reconstruction (lower left panels), local resolution maps (middle and right panels) and match of structure in map (right and

lower right panels) of **a** Conformation I, **b** Conformation II and **c** Conformation III. In **a** the resolution is of sufficient quality to identify secondary structure elements. In **b** and **c** the resolution is of sufficient quality to dock in the linker middle-top domains and the linker stem-AAA+ring-NTD. Due to the use of binned data the 0.143 FSC criteria has not been reached in **a** and **c**. No substantial improvements in the resolution are to be expected with the unbinned data.

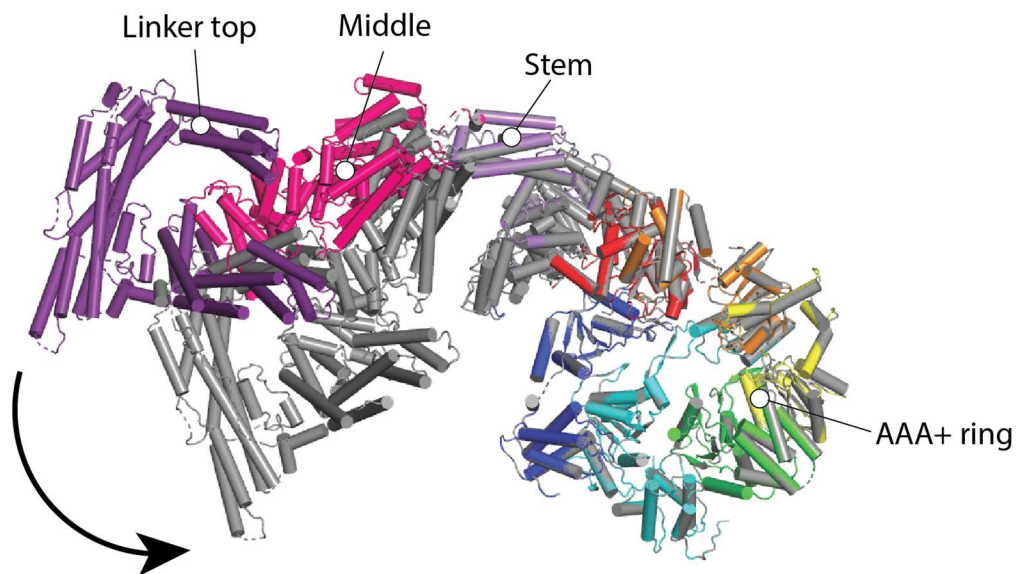

**Supplementary Fig. 18: Conformations II and III of Rea1<sub>D2915A-R2976A-D3042A</sub> ATP are related by a swing of the linker middle and top domains towards the AAA+ ring.** Conformation II is color coded, Conformation III is shown in grey. The structures have been aligned on the AAA+ rings. The black arrow indicates the swing towards the AAA+ ring. The region between the linker middle and stem domains acts as pivot point.

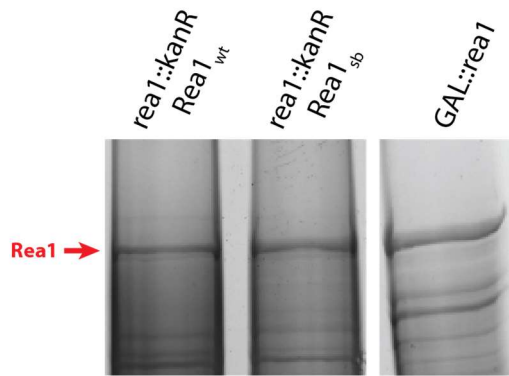

**Supplementary Fig. 19: The Rea1<sub>D2915A-R2976A-D3042A</sub> mutant shows expression levels comparable to Rea1<sub>wt</sub>.** The lysates of *S. cerevisiae* strains harbouring centromeric plasmids expressing Rea1<sub>wt</sub> (rea1::kanR Rea1<sub>wt</sub>) or the Rea1<sub>D2915A-R2976A-D3042A</sub> construct (rea1::kanR Rea1<sub>sb</sub>) under the control of the endogenous Rea1 promoter and terminator regions were analysed by SDS-PAGE and silver staining. A *S. cerevisiae* strain overexpressing Rea1 in the presence of galactose (GAL::rea1) was processed in parallel to identify the band for Rea1 (red arrow). The expression levels of Rea1<sub>wt</sub> and Rea1<sub>D2915A-R2976A-D3042A</sub> are similar. The experiments were repeated four times.

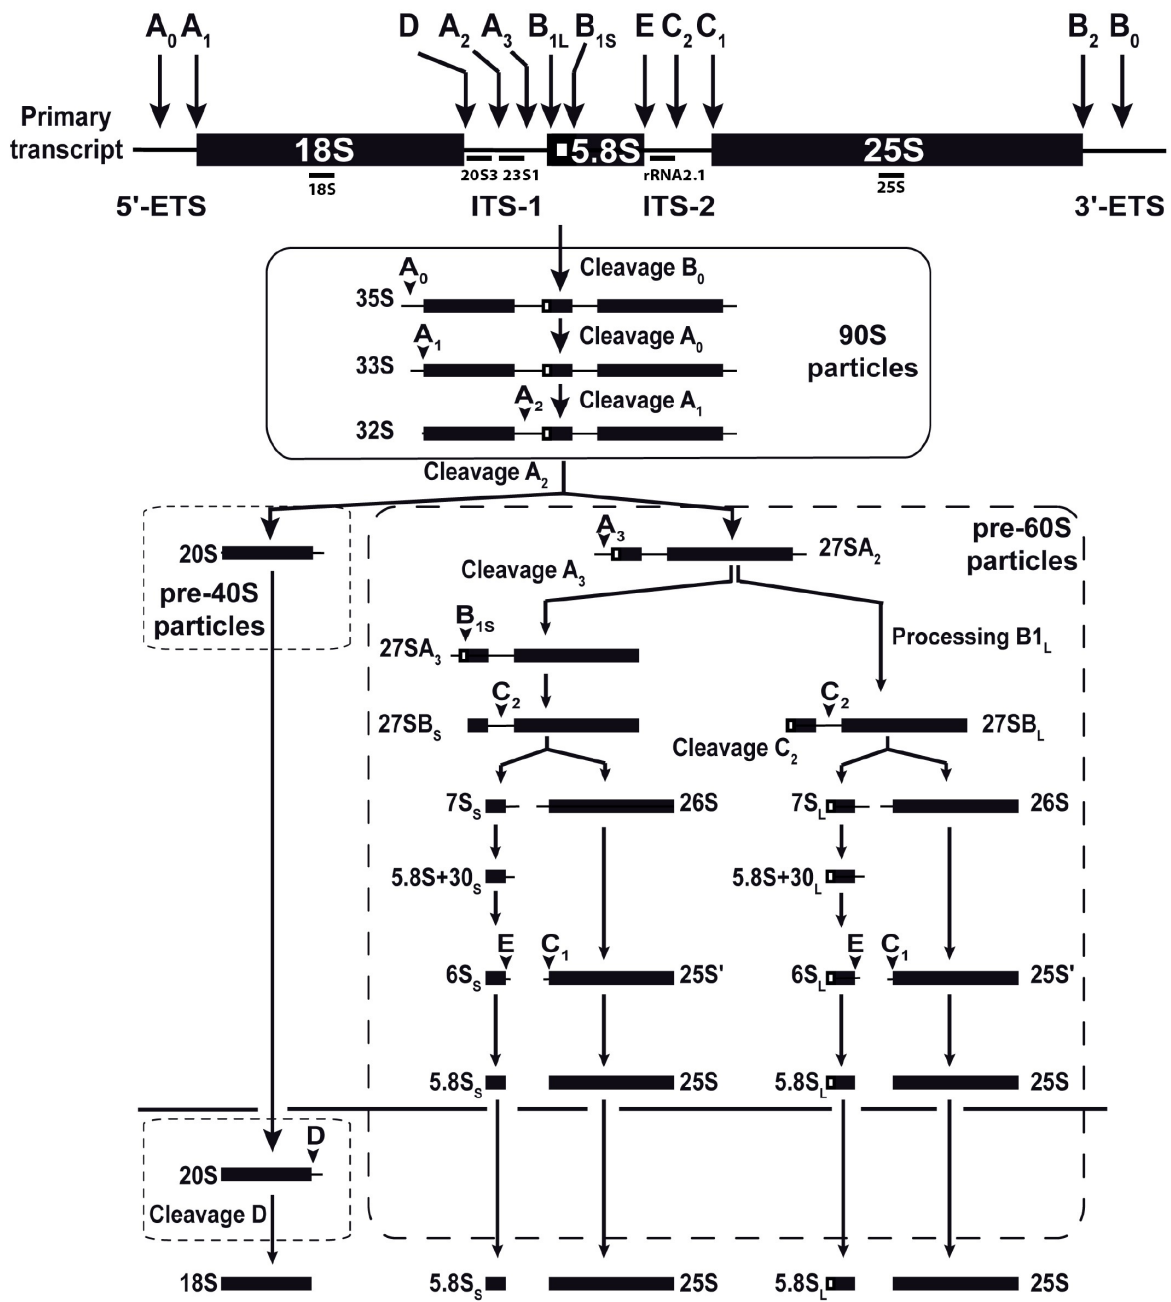

Supplementary Fig. 20: Cartoon of the pre-rRNA processing pathway in *S. cerevisiae*.

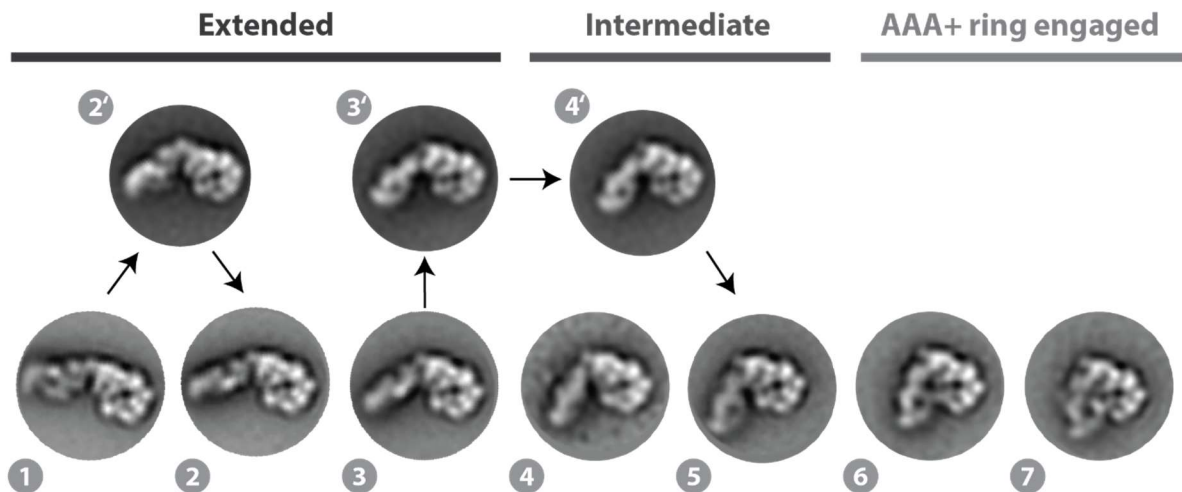

**Supplementary Fig. 21: The swing and the rotation of the linker top and middle domains during linker remodelling are not strictly correlated.** In addition to the linker states most commonly observed in our data sets (here states 1 – 7 of Rea1<sub>wt</sub> ATP as an example), additional extended and intermediate linker remodelling states were occasionally detected. Linker state 2' represents a swing from state 1 towards the AAA+ ring without rotation. In state 3' the linker middle and top domains are already fully rotated before reaching the proximity of the AAA+ ring. They swing without rotation via state 4' to state 5.



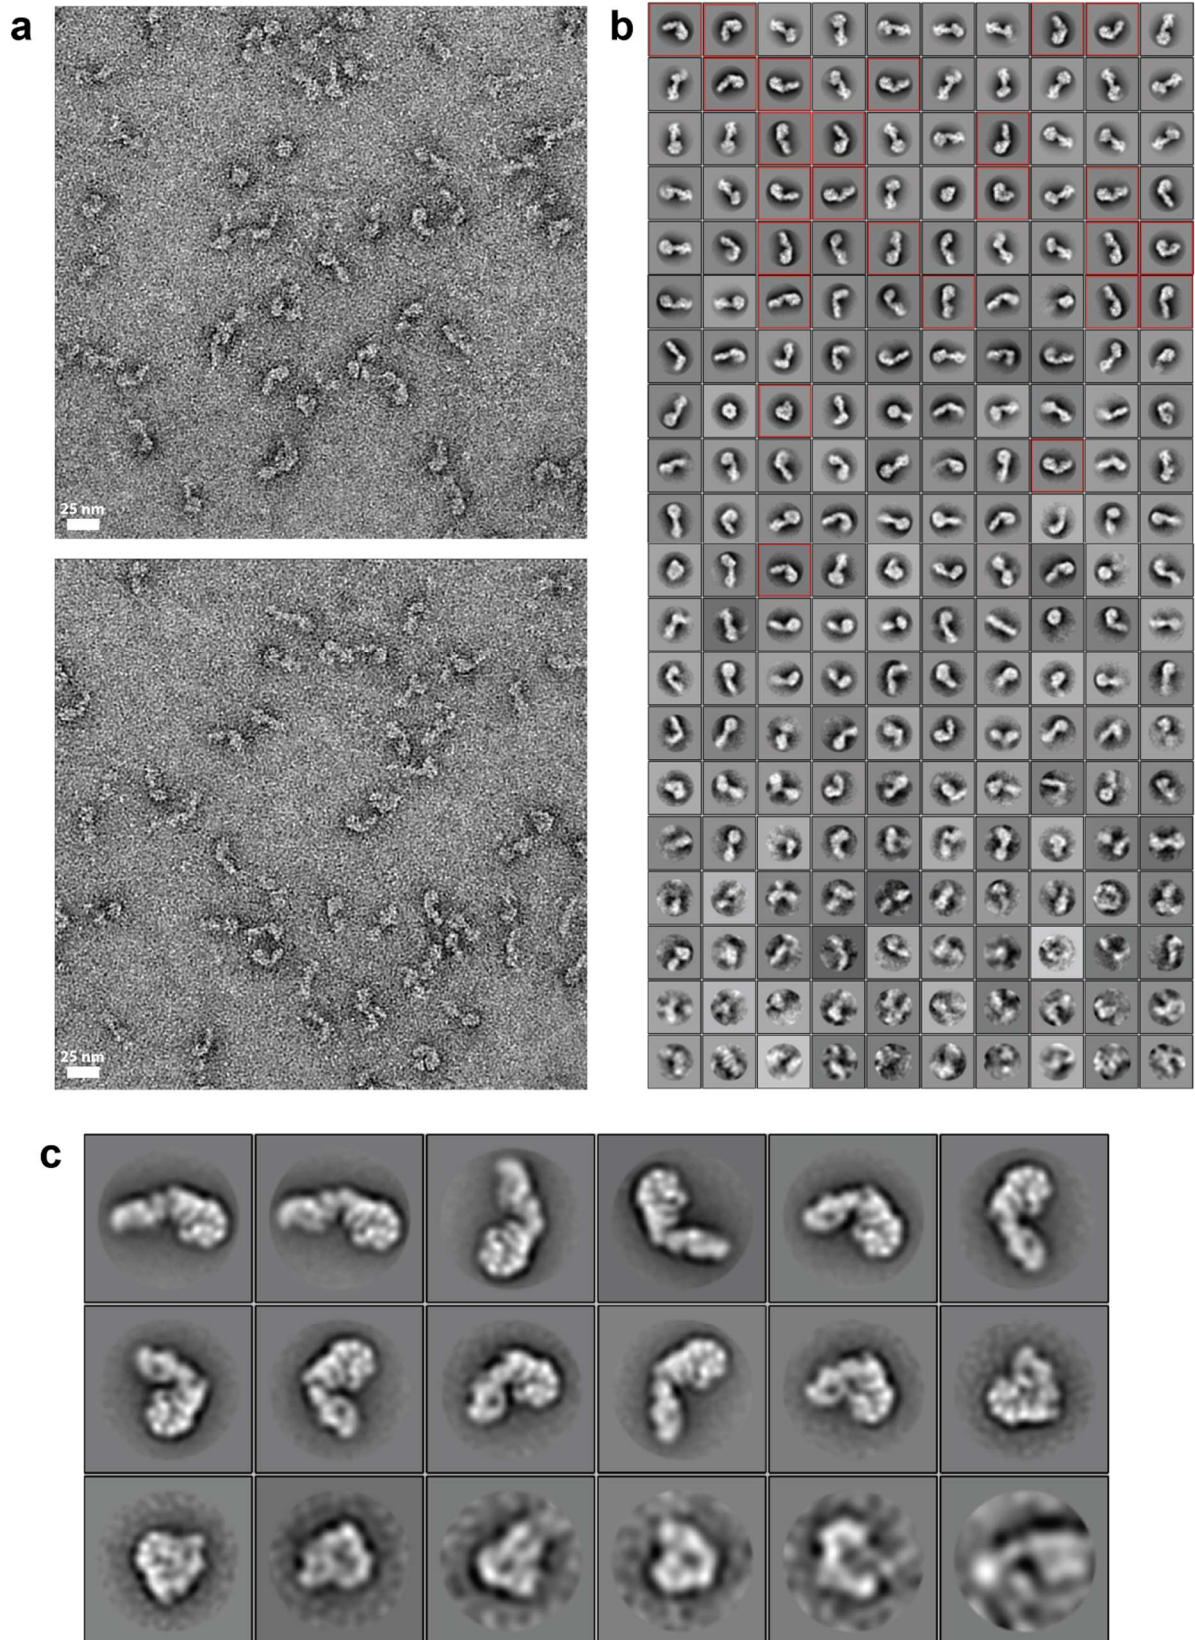

**Supplementary Fig. 22: Quality of negative stain EM data.** **a** Two representative micrographs of the  $\text{Rea1}_{\Delta\text{AAA}2\text{H}2\alpha}$  ATP $\gamma$ S data set. **b** Initial 2D classification on 4x binned particles. 2D classes representing AAA+ ring top views of interest (red squares) were selected for a 2<sup>nd</sup> round of 2D classification. **c** 2<sup>nd</sup> round of 2D classification with the un-binned particles selected in **b**.

|                                        | #1 Rea1 <sub>ΔAAA2H2α</sub><br>ATP <sub>γ</sub> S<br>(EMDB-50815) | #2 Rea1 <sub>sb</sub> ATP<br>Conformation I<br>(EMDB-50816) | #2 Rea1 <sub>sb</sub> ATP<br>Conformation II<br>(EMDB-50817) | #2 Rea1 <sub>sb</sub> ATP<br>Conformation III<br>(EMDB-50818) |
|----------------------------------------|-------------------------------------------------------------------|-------------------------------------------------------------|--------------------------------------------------------------|---------------------------------------------------------------|
| <b>Data collection and processing</b>  |                                                                   |                                                             |                                                              |                                                               |
| Magnification                          | 81000                                                             | 81000                                                       | 81000                                                        | 81000                                                         |
| Voltage (kV)                           | 300                                                               | 300                                                         | 300                                                          | 300                                                           |
| Electron exposure (e-/Å <sup>2</sup> ) | 45                                                                | 45                                                          | 45                                                           | 45                                                            |
| Defocus range (μm)                     | 1.8 – 3.4                                                         | 1.8 – 3.4                                                   | 1.8 – 3.4                                                    | 1.8 – 3.4                                                     |
| Pixel size (Å)                         | 0.862                                                             | 0.862                                                       | 0.862                                                        | 0.862                                                         |
| Symmetry imposed                       | C1                                                                | C1                                                          | C1                                                           | C1                                                            |
| Initial particle images (no.)          | 230116                                                            | 1035433                                                     | 1035433                                                      | 1035433                                                       |
| Final particle images (no.)            | 102746                                                            | 322561                                                      | 254169                                                       | 242525                                                        |
| Map resolution (Å)                     | 7.1                                                               | 6.9                                                         | 7.1                                                          | 6.9                                                           |
| FSC threshold                          | 0.143                                                             | 0.143                                                       | 0.143                                                        | 0.143                                                         |
| Map resolution range (Å)               | 7-19                                                              | 6.5 – 8.5                                                   | 7-19                                                         | 7-19                                                          |

**Supplementary Table 1: CryoEM data collection and validation statistics. Rea1<sub>sb</sub> = Rea1<sub>D2915A-R2976A-</sub>**

D3042A

## ATPyS

248 + 2318 1306 + 1873  
249 + 1978 1311 + 1320  
249 + 2318 1315 + 1320  
293 + 304 1315 + 1548  
293 + 436 1315 + 1548  
304 + 2265 1318 + 3522  
304 + 2318 1361 + 1439  
304 + 321 1361 + 1548  
304 + 361 1361 + 1873  
304 + 377 1419 + 1463  
304 + 436 1419 + 1548  
304 + 441 1419 + 3104  
321 + 377 1439 + 1548  
316 + 436 1439 + 1978  
316 + 441 1439 + 2179  
316 + 492 1439 + 2186  
316 + 499 1447 + 2186  
321 + 377 1548 + 1593  
361 + 859 1548 + 1600  
361 + 1447 1548 + 1630  
361 + 2186 1548 + 1873  
361 + 436 1548 + 4662  
377 + 859 1593 + 1601  
377 + 2149 1767 + 2251  
377 + 417 1924 + 1926  
436 + 859 1924 + 1980  
436 + 885 1980 + 2179  
436 + 2265 1980 + 4570  
436 + 489 1980 + 4576  
436 + 492 1980 + 4785  
436 + 499 1980 + 2186  
436 + 505 1995 + 2458  
441 + 2265 2149 + 2186  
441 + 2318 2316 + 2946  
441 + 505 2318 + 2939  
489 + 3669 2318 + 2946  
492 + 505 2318 + 4452  
499 + 885 2416 + 2424  
499 + 4792 2416 + 2431  
505 + 885 2416 + 2452  
505 + 956 2421 + 2452  
505 + 4792 2424 + 2452  
505 + 611 2584 + 2855  
611 + 859 2584 + 2864  
611 + 4662 2677 + 4469  
611 + 619 2701 + 3307  
611 + 668 2701 + 3310  
613 + 619 2705 + 3310  
613 + 673 2707 + 2793  
618 + 668 2707 + 3195  
619 + 668 2793 + 3195  
619 + 673 2793 + 3334  
668 + 673 2801 + 3334  
619 + 2149 2939 + 2946  
818 + 859 2939 + 2958  
859 + 885 3104 + 3245  
859 + 1980 3161 + 3180  
859 + 2149 3161 + 3195  
859 + 4662 3166 + 3180  
859 + 4668 3180 + 3396  
859 + 4785 3195 + 3334  
866 + 885 3220 + 3455  
866 + 4662 3220 + 3459  
885 + 956 3303 + 3310  
885 + 3104 3356 + 3522  
941 + 956 3455 + 3486  
1005 + 1017 3514 + 3527  
1005 + 1020 3522 + 3527  
1005 + 1038 3569 + 4662  
1005 + 1063 3586 + 4163  
1010 + 1020 3586 + 4169  
1020 + 2318 3586 + 4171  
1020 + 3669 3586 + 4180  
1089 + 1265 3657 + 3662  
1103 + 1439 3669 + 3677  
1103 + 3104 3793 + 3907  
1244 + 1306 3954 + 3961  
1244 + 1311 3955 + 4662/4668  
1244 + 1318 4163 + 4171  
1244 + 1361 4459 + 4469  
1244 + 1419 4635 + 4719  
1244 + 1548 4635 + 4792  
1265 + 1306 4662 + 4664  
1265 + 1315 4662 + 4785  
1265 + 1439 4662 + 4792  
1265 + 1548 4719 + 4753  
1265 + 1873 4753 + 4785  
1265 + 4662 4753 + 4792  
1306 + 1315 4780 + 4785  
1306 + 1361 4784 + 4792  
1306 + 1548 4719 + 4792

## APO

83 + 2931 1094 + 1548  
147 + 3669 1103 + 1419  
203 + 1422 1103 + 3104  
248 + 2318 1243 + 2458  
249 + 2318 1244 + 1306  
249 + 304 1244 + 1315  
249 + 316 1244 + 1419  
249 + 321 1244 + 1548  
249 + 436 1244 + 1873  
293 + 859 1265 + 1306  
293 + 377 1265 + 1315  
304 + 859 1265 + 1320  
304 + 866 1265 + 1361  
304 + 885 1265 + 1419  
304 + 1265 1265 + 1548  
304 + 2265 1265 + 1873  
304 + 2318 1265 + 4662  
304 + 2946 1306 + 1315  
304 + 4662 1306 + 1345  
304 + 321 1306 + 1548  
304 + 361 1306 + 1873  
304 + 377 1310 + 1320  
304 + 436 1310 + 4671  
304 + 441 1311 + 1320  
316 + 2265 1315 + 1320  
316 + 377 1315 + 1548  
316 + 436 1345 + 1873  
316 + 441 1361 + 1548  
316 + 492 1419 + 1447  
321 + 859 1419 + 1463  
321 + 885 1419 + 1548  
321 + 2265 1439 + 1548  
321 + 377 1447 + 1548  
321 + 417 1451 + 1548  
321 + 436 1463 + 1548  
361 + 859 1548 + 1593  
361 + 2186 1548 + 1600  
361 + 377 1548 + 1630  
361 + 436 1548 + 1873  
377 + 859 1548 + 1980  
377 + 866 1924 + 1926  
377 + 885 1995 + 2458  
377 + 2149 2149 + 2186  
377 + 2265 2316 + 2318  
377 + 2318 2316 + 2946  
377 + 4662 2316 + 4452  
377 + 417 2318 + 2939  
377 + 436 2318 + 2946  
377 + 441 2416 + 2424  
377 + 611 2424 + 2452  
436 + 859 2458 + 2958  
436 + 885 2677 + 4469  
436 + 2265 2701 + 3310  
436 + 489 2793 + 3195  
436 + 499 2793 + 3334  
436 + 505 2939 + 2946  
436 + 668 3104 + 3245  
441 + 2265 3161 + 3180  
441 + 2318 3161 + 3195  
489 + 3669 3166 + 3180  
505 + 885 3180 + 3396  
505 + 956 3195 + 3334  
611 + 859 3356 + 3522  
611 + 1265 3455 + 3486  
611 + 668 3514 + 3527  
613 + 619 3522 + 3527  
613 + 668 3586 + 4163  
613 + 673 3586 + 4169  
618 + 668 3586 + 4171  
668 + 4785 3586 + 4180  
668 + 673 3657 + 3662  
818 + 859 3669 + 3677  
859 + 1265 4163 + 4171  
859 + 1980 4169 + 4180  
859 + 2149 4359 + 4370  
859 + 2265 4459 + 4469  
859 + 4662 4545 + 4570  
859 + 4785 4570 + 4662  
866 + 885 4635 + 4792  
866 + 4662 4662 + 4753  
885 + 956 4662 + 4785  
885 + 3104 4662 + 4792  
1005 + 1017 4719 + 4792  
1005 + 1020 4753 + 4785  
1005 + 1265 4753 + 4792  
1005 + 1548 4780 + 4785  
1020 + 2318  
1020 + 2707  
1020 + 3669  
1089 + 1103  
1094 + 1265

## AMPPNP

147 + 3669 2677 + 4469  
203 + 1422 2701 + 3307  
248 + 2318 2701 + 3310  
249 + 1980 2793 + 3195  
249 + 2318 2793 + 3334  
293 + 436 2939 + 2946  
304 + 2265 3104 + 3245  
304 + 2318 3161 + 3180  
304 + 321 3161 + 3195  
304 + 377 3166 + 3180  
304 + 436 3180 + 3396  
304 + 441 3195 + 3334  
316 + 436 3356 + 3522  
316 + 441 3455 + 3486  
316 + 492 3522 + 3527  
321 + 866 3586 + 4163  
321 + 377 3586 + 4169  
361 + 859 3586 + 4171  
361 + 2186 3586 + 4180  
377 + 859 3657 + 3662  
377 + 2149 3669 + 3677  
436 + 885 4163 + 4171  
436 + 2265 4359 + 4370  
436 + 489 4459 + 4469  
436 + 499 4545 + 4570  
436 + 505 4635 + 4719  
441 + 2265 4662 + 4785  
489 + 3669 4753 + 4785  
499 + 4792 4753 + 4792  
505 + 885 4780 + 4785  
505 + 956  
505 + 4792  
611 + 859  
611 + 619  
611 + 668  
613 + 619  
613 + 668  
613 + 673  
618 + 668  
668 + 673  
818 + 859  
859 + 2149  
885 + 956  
885 + 3104  
1005 + 1017  
1005 + 1020  
1017 + 3669  
1020 + 2316  
1103 + 3104  
1244 + 1306  
1244 + 1311  
1244 + 1315  
1244 + 1318  
1244 + 1548  
1265 + 1306  
1265 + 1315  
1265 + 1548  
1265 + 1873  
1306 + 1315  
1306 + 1548  
1311 + 1320  
1311 + 4671  
1315 + 1320  
1315 + 1548  
1419 + 1463  
1419 + 1548  
1439 + 1548  
1439 + 2186  
1447 + 2186  
1548 + 1600  
1548 + 1630  
1548 + 1873  
1548 + 4662  
1767 + 2251  
1924 + 1926  
1980 + 4570  
1995 + 2458  
2149 + 2186  
2316 + 2946  
2316 + 4452  
2318 + 2939  
2318 + 2946  
2416 + 2424  
2416 + 2431  
2416 + 3455  
2421 + 2452  
2424 + 2452  
2458 + 2958  
2622 + 2839

**Supplementary Table 2: List of validated K-K crosslinks in the Rea1 $\Delta$ AAA2H2 $\alpha$  ATPyS, APO and AMPPNP mass spectrometry data sets.** Crosslinks between the linker top2 region and the MIDAS domain are highlighted in yellow. K-K crosslinks are labelled according to *S. cerevisiae* Rea1<sub>wt</sub> numbering. Please note that in the data sets submitted to the ProteomeXchange Consortium Rea1 $\Delta$ AAA2H2 $\alpha$  numbering will be used.

|      |                                                                         |
|------|-------------------------------------------------------------------------|
| GK1  | AGGTGTGTCTAGACTTAGTTCGAAAAGTGCCACCTGGGTCTTTTC                           |
| GK2  | AGAAAGATATAAAATTTTGC GGAAATGTGCGCGGAACCCCTATTG                          |
| GK3  | GCAAAATTTTATATCTTTCTTGGAATC                                             |
| GK4  | CACGATATACTTACATTCTCAGCAGATTATAACGGTTTTA                                |
| GK5  | CTGCTGAGAATGTAAGTATATCGTGAAAACCAAGAAGAG                                 |
| GK6  | AACTAAGTCTAGACACACCTCCTGGTG                                             |
| GK7  | TGGCATCCAGCTAAGTATATCGTGAAAACCAAG                                       |
| GK8  | CTATCCTGGGACATTCTCAGCAGATTATAAC                                         |
| GK9  | ATCTGCTGAGAATGTCCCAGGATAGAATTTTGTTAG                                    |
| GK10 | TCACGATATACTTAGCTGGATGCCAGGTCTGTAAAG                                    |
| GK11 | GCCGGATCATAGGGAGAATCGCCTCCCGACAACGTAAAACATCGGTAAATTC                    |
| GK12 | CTCAATCCCCTAGGGTTCTGGGTTCTGTTCTCCGCAGCCACCATCTG                         |
| GK13 | TTTTACAGTTGTCTGGGAGGCGATTCTCCCTATGATCCGGCAATACAC                        |
| GK14 | GGCTGCGGAGAACAGAACCCAGAACCCCTAGGGGATTGAGGTGCGTCGTCATC                   |
| GK15 | CAGATTCTCCCTATGCACCCGCAATACAC                                           |
| GK16 | GTGTATTGCCGGTGCATAGGGAGAATCTG                                           |
| GK17 | CTAGGGTATATGCAACAGGCATGTCTATTG                                          |
| GK18 | CAATAGACATGCCTGTTGCATATACCCTAG                                          |
| GK19 | GGTTATTCAAATTTGCTGCATTAATGATATCCTC                                      |
| GK20 | GAGGATATCATTTAATGCAGCAAATTTGAATAACC                                     |
| GK21 | GGAGCCCACATCGTGATGGTGGACGCCTACAAGCCGACGAAGTAAGGTACCGAGCTCGGATCCAC       |
| GK22 | CTTCGTCGGCTTGAGGCGTCCACCATCACGATGTGGGCTCCTGAATTATCACTTGCCTTATCATC       |
| GK23 | GGAGCCCACATCGTGATGGTGGACGCCTACAAGCCGACGAAGGGTACTGATGATAACTGGTTATCAGCTAG |
| GK24 | ACCCTTCGTCGGCTTGAGGCGTCCACCATCACGATGTGGGCTCCTTCGGATATAGATTCAATTCCATC    |
| GK25 | GCTTTTAGAGGGAATGTCTAAAGGTGAAGAATTATTC                                   |
| GK26 | GTCACCACTGCCAGATCCACCATGGGTAATACCAGCAGCAG                               |
| GK27 | CATGGTGGATCTGGCAGTGGTACTTGAAAAGATCTTGCTAATC                             |
| GK28 | TAGACATTCCCTCTAAAAGCCTTGAGGATAC                                         |
| GK29 | CTATTGCTCGATCAAGTGAATTTAGCAAC                                           |
| GK30 | GTTGCTAAATTCACCTGATCGAGCAATAG                                           |
| GK31 | GTTTTGGATCAATTAATCTTGCCCAAC                                             |
| GK32 | GTTGGGCAAGATTTAATTGATCCAAAAC                                            |
| GK33 | CTACTTGATCAAATATCGCTAGCAGATGATTC                                        |
| GK34 | GAATCATCTGCTAGCGATATTTGATCAAGTAG                                        |
| GK35 | GTGGGTTTTATTAGATCAAATGAATTTAGCCTC                                       |
| GK36 | GAGGCTAAATTCATTTGATCTAATAAAAACCCAC                                      |
| GK37 | CTATTGCTCGATCAAGTGAATTTAGCAAC                                           |
| GK38 | AGATCTGAACGTTGATACCTTATCAGGTTTATCAAG                                    |
| GK39 | GCTCGAGACctccAATATGAGCGTCACCTTTAGTTG                                    |
| GK40 | TCATATTggaGGTCTCGAGCACCACCAC                                            |
| GK41 | AGGTATCAACGTTTCAGATCTTCTCGC                                             |
| TK1  | AGGGCGGATCCCACATCTCTGATGAACAATTG                                        |
| TK2  | CTTCGGACCGTTAGCTGTTACCTCTGCGAAC                                         |
| TK3  | GAACAGCTAACGGTCCGAAGCGCGGAATTC                                          |
| TK4  | CAGAGATGTGGGATCCGCCCTGAAAATAAAGATTC                                     |
| TK5  | TTTCAGGGCGGATCCGGTGCAGAAAAGCCATAAGTG                                    |
| TK6  | GCGCGCTTCGGACCGACCTTGAGAGGCTATTTGGAC                                    |
| TK7  | ATAGCCTCTCAAGGTCGGTCCGAAGCGCGCGGAATTC                                   |
| TK8  | GGCTTTCTGATCACCGGATCCGCCCTGAAAATAAAGATTC                                |
| DV1  | TGACAGGCTCGGGCAGCGGTAGTAAACGTGCTTACCAG                                  |

|         |                                                                           |
|---------|---------------------------------------------------------------------------|
| DV2     | CAATTGAGGTTGATATTGACAGGCTCGGGCAGCGGTAGTAAACG                              |
| OHA529  | CCTCTGAGTTAATTTGACATCGAATTCTACTCTTATTATTTTAAAGTACCGAATTCGAGCTCGTTTAAAC    |
| OHA530  | ATTAACCTTTGGTTAACTACGTCTAAATCTAACAAAATTCTATCCTGGGACATTTTGAGATCCGGGTTTT    |
| OHA532  | GGCATTGATTTTAAATGCACTTGAACCG                                              |
| OHA533  | ACATGACCAGTGATGGAACGGC                                                    |
| OHA534  | GTCCGTTCTCTTAACAACCAAAGCC                                                 |
| OHA543  | GTCAAGACAAAAAGATTCAAATAAATAAAGGAGACAACATTTTCAAAAACCGGATCCCCGGGTTAATTAA    |
| OHA544  | TTCAAGTATATCAGTACATTATTCTACATAAAAAACAACAACAGTTTTTTTTCGAATTCGAGCTCGTTTAAAC |
| OHA545  | TTTCTCTCTGGACACTTGTC                                                      |
| OHA546  | CCGCCAGAATGGTTTGAAAAGG                                                    |
| OHA553  | GATCAGAAGGTGGAGGAATCAGGGGTTTTAGAGCTAG                                     |
| OHA554  | CTAGCTCTAAAACCCCTGATTCCTCCACCTTCT                                         |
| OHA551  | TTTTTATATTTGTAACCTCGATAAACACACACTAACACAATATACAGATGCGGATCCCCGGGTTAATTAAAC  |
| OHA552  | AGTTGAGCCTCTTTCTTTTGTTCCTTAGAAGGTGGAGGAATCAGGGTGGAGCACTGAGCAGCGTAATCTGG   |
| OHA559  | AGCTCATAGAGTGGTCAACGTC                                                    |
| OHA560  | GAAGGTATATGGCACTGGATCG                                                    |
| OHA631  | CAGATTACGCTCATATGGAAAGATCGTTAGAAGAATCCCGTG                                |
| OHA632  | CGAGCTCGATGGATCCTTAGCTGGATGCCAGGTCTG                                      |
| OHA633  | CAGATTACGCTCATATGTATTCCAACGAAAATAAACTAAAAC                                |
| OHA634  | CGAGCTCGATGGATCCTTAATTTTTGGCTAAGCTATGC                                    |
| OHA635  | CAGATTACGCTCATATGATTGACACGGTAGCAAGTAACA                                   |
| OHA636  | CGAGCTCGATGGATCCTTAATTTTTGGCTAAGCTATGCAAT                                 |
| OHA637  | CAGATTACGCTCATATGGATATTGTTTCATTCTTCATTTAAAAG                              |
| OHA638  | CGAGCTCGATGGATCCTTATTCTTTTTAATAGGACCCC                                    |
| OHA639  | AGGAGGACCTGCATATGGAAAGATCGTTAGAAGAATCCCGTG                                |
| OHA640  | GCAGGTCGACGGATCCTTAGCTGGATGCCAGGTCTG                                      |
| OHA641  | AGGAGGACCTGCATATGTATTCCAACGAAAATAAACTAAAAC                                |
| OHA642  | GCAGGTCGACGGATCCTTAATTTTTGGCTAAGCTATGC                                    |
| OHA643  | AGGAGGACCTGCATATGATTGACACGGTAGCAAGTAACA                                   |
| OHA644  | GCAGGTCGACGGATCCTTAATTTTTGGCTAAGCTATGCAAT                                 |
| OHA645  | AGGAGGACCTGCATATGGATATTGTTTCATTCTTCATTTAAAAG                              |
| OHA646  | GCAGGTCGACGGATCCTTATTCTTTTTAATAGGACCCC                                    |
| 18S     | CATGGCTTAATCTTTGAGAC                                                      |
| 20S.3   | TTAAGCGCAGGCCCGGCTGG                                                      |
| 23S.1   | GATTGCTCGAATGCCCAAAG                                                      |
| rRNA2.1 | GGCCAGCAATTTCAAGTTA                                                       |
| 25S     | CTCACGACGGTCTAAACCC                                                       |

**Supplementary Table 3: Table of oligonucleotide sequences used in the study.**

**Source Data for Supplementary Figures**

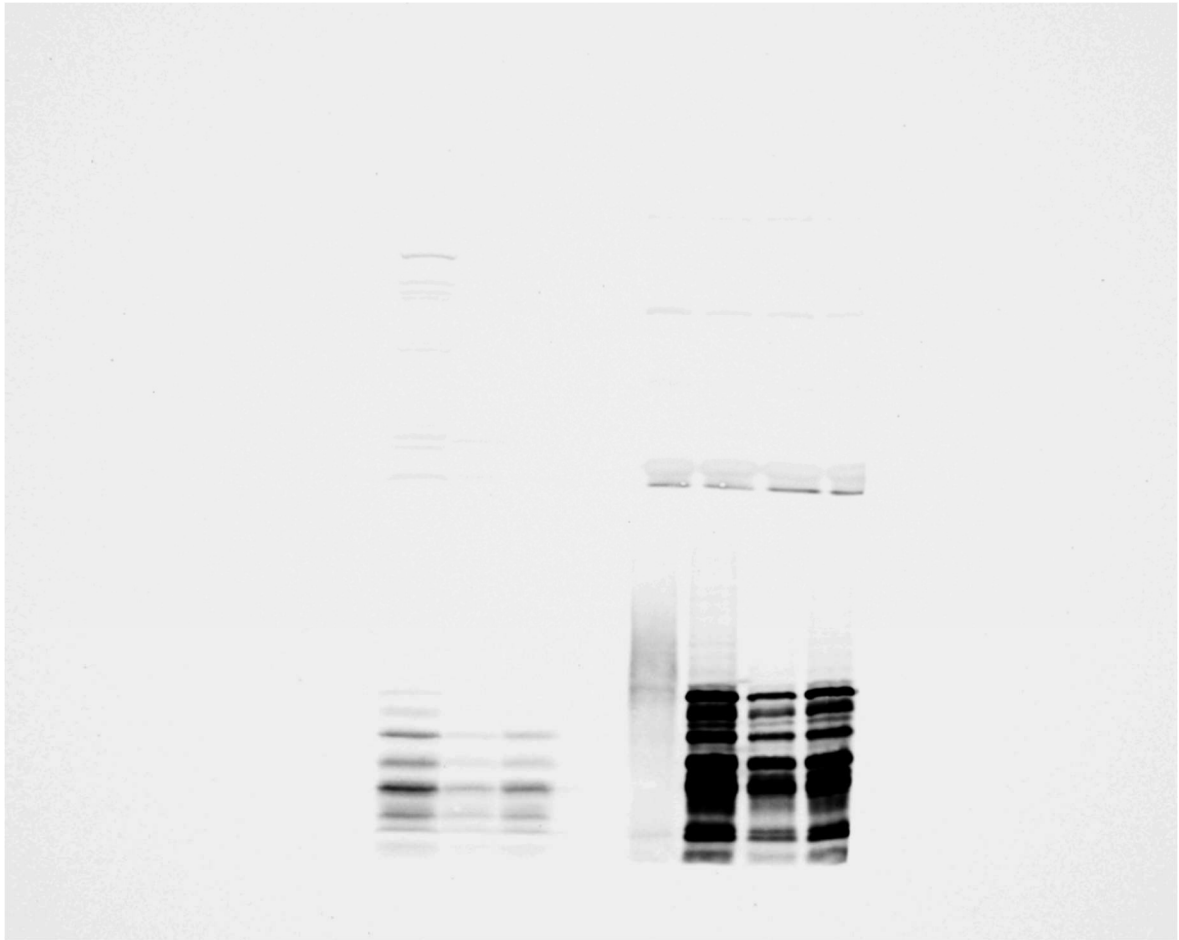

**Source Data Supplementary Figure 14B. Anti-HA western blot.**

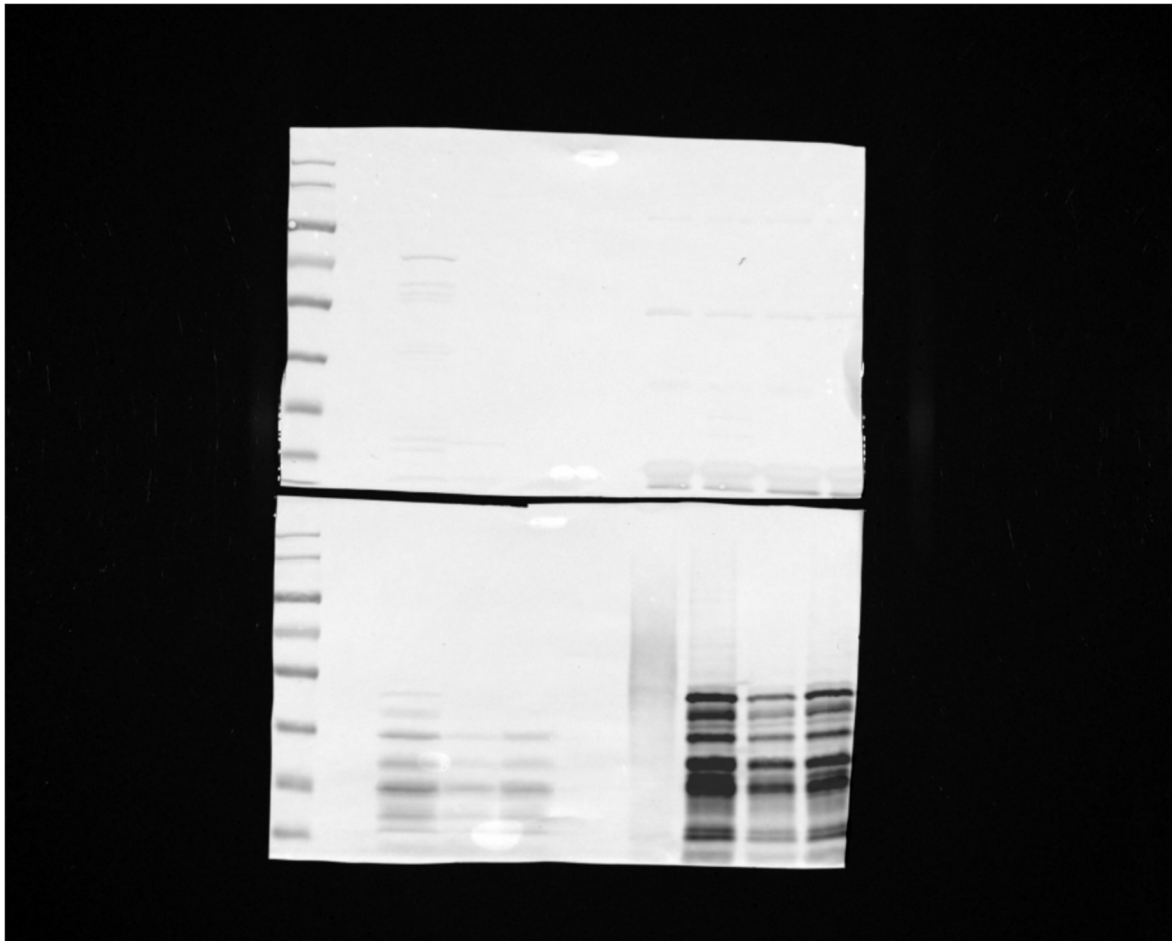

**Source Data Supplementary Figure 14B. Anti-HA western blot with molecular weight marker (Left lane).** Molecular weight marker: PageRuler prestained protein ladder (Life Technologies, Cat. #26616). Top to bottom (kDa): 180, 130, 100, 70, 55, 40, 35, 25.

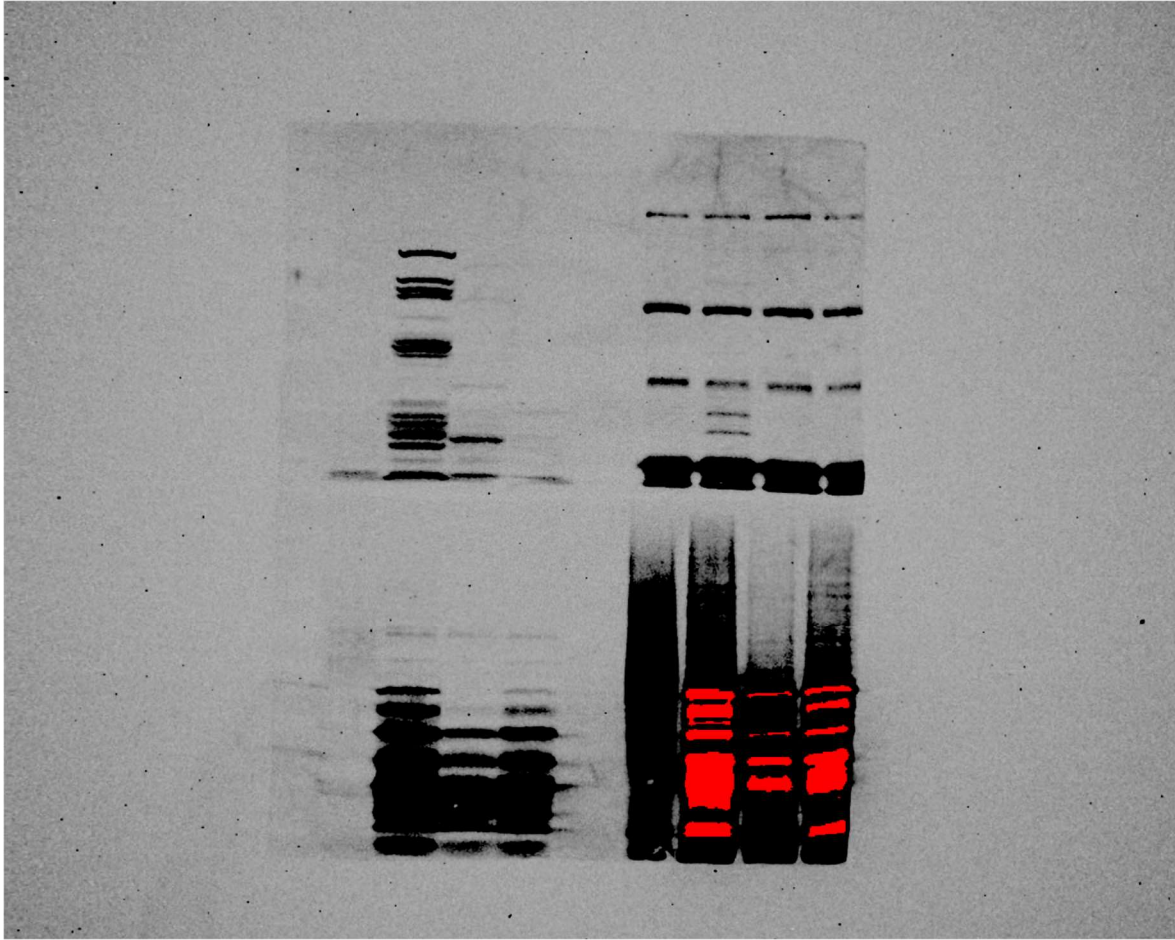

Source Data Supplementary Figure 14B. Anti-Myc western blot.



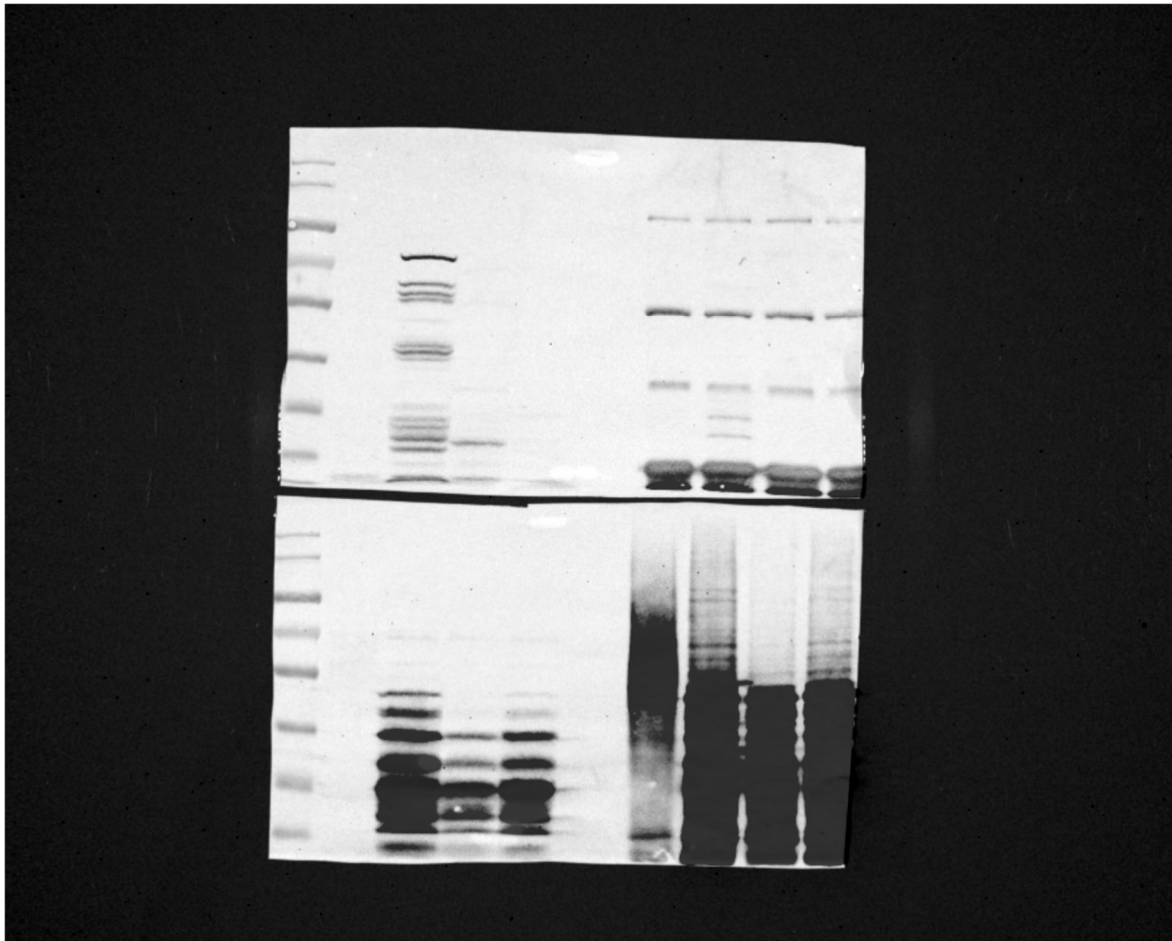

**Source Data Supplementary Figure 14B. Anti-Myc western blot with molecular weight marker (left lane).** Molecular weight marker: PageRuler prestained protein ladder (Life Technologies, Cat. #26616. Top to bottom (kDa): 180, 130, 100, 70, 55, 40, 35, 25.

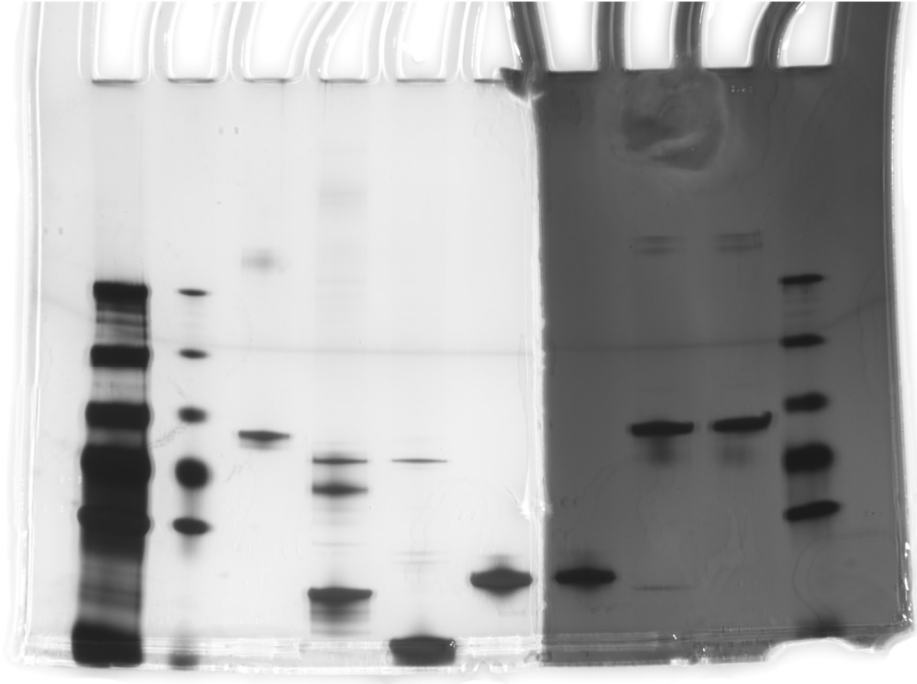

Source Data Supplementary Figure 15.

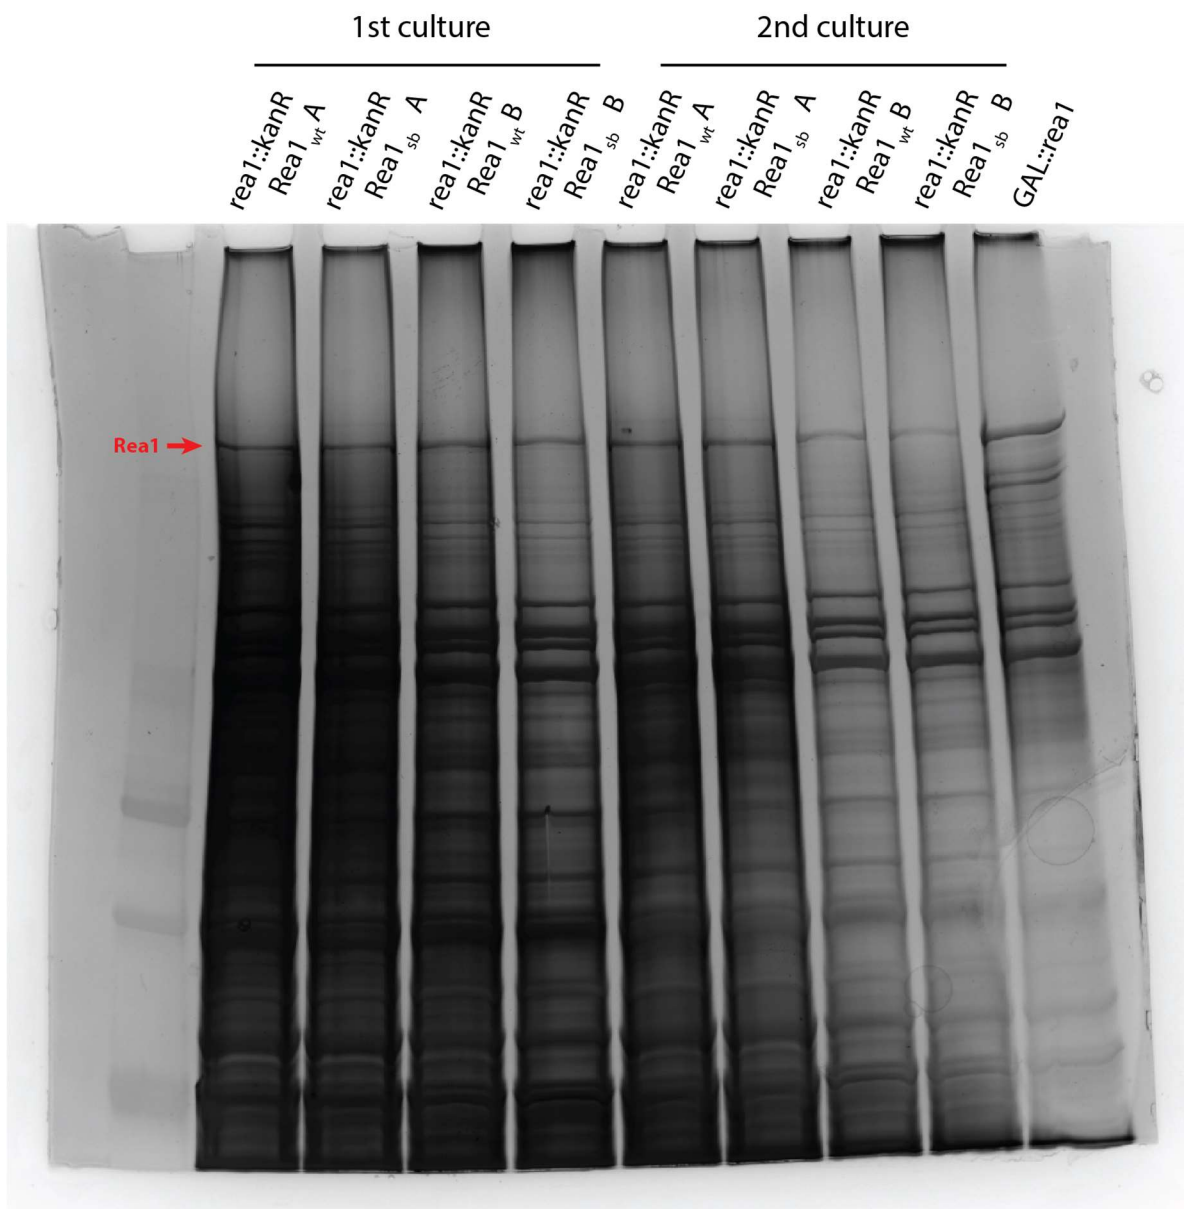

Source Data Supplementary Figure 19.
