# Supplementary material for: Remodelling of Rea1 linker domain drives the removal of assembly factors from pre-ribosomal particles
Source: PubMed Central journal article supplement (PMC11603028; doi:10.1038/s41467-024-54698-w), 2024-11-27
Supplement: 41467_2024_54698_MOESM3_ESM.pdf [file 41467_2024_54698_MOESM3_ESM.pdf]

## **Description of Additional Supplementary Files**

### **File name: Supplementary Movie 1**

Description: Linker remodelling states 1 - 8 aligned on AAA+ ring.

### **File name: Supplementary Movie 2**

Description: Linker remodelling states 1 - 8 aligned on long linker axis.

### **File name: Supplementary Movie 3**

Description: Microtububle gliding event example 1.

### **File name: Supplementary Movie 4**

Description: Microtububle gliding event example 2.

### **File name: Supplementary Movie 5**

Description: Microtububle gliding event example 3.

### **File name: Supplementary Movie 6**

Description: Linker remodelling in Rea1D2915A-R2976A-D3042A mutant.

### **File name: Supplementary Movie 7**

Description: Microtubule gliding positive control with human dynein 2.
